# Supplementary material for: Pyridine-amido aluminum catalyst precursors for 1,3-butadiene transition-metal-free stereospecific polymerization
Source: Royal Society of Chemistry journal article supplement (doi:10.1039/d2py01093c), 2023-01-01
Supplement: d2py01093c1.pdf [file d2py01093c1.pdf]

*Supporting Information*

**Pyridine-Amido Aluminum Catalyst  
Precursors for 1,3-Butadiene Transition-  
Metal-Free Stereospecific Polymerization**

*Jian Tan<sup>1</sup>, Zijian Xu<sup>1</sup>, Zelong Liu<sup>1</sup>, Yuan Fu<sup>1</sup>, Jing Hua<sup>1\*</sup>*

<sup>1</sup>Key Laboratory of Rubber-Plastics, Ministry of Education / Shandong Provincial Key

Laboratory of Rubber-plastics, Qingdao University of Science and Technology, Qingdao

266042, P.R. China.

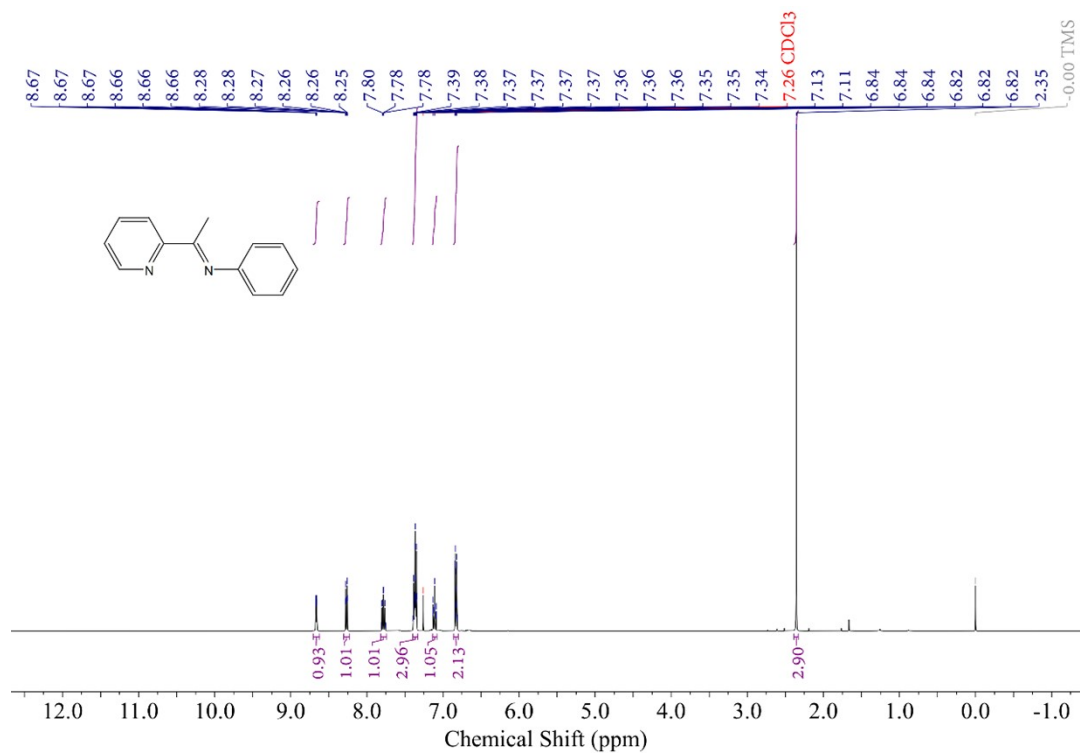

**Figure S1**  $^1\text{H}$  NMR spectrum of pro-ligand pyridine-2-C(Me)=N(Ph) (**1**).

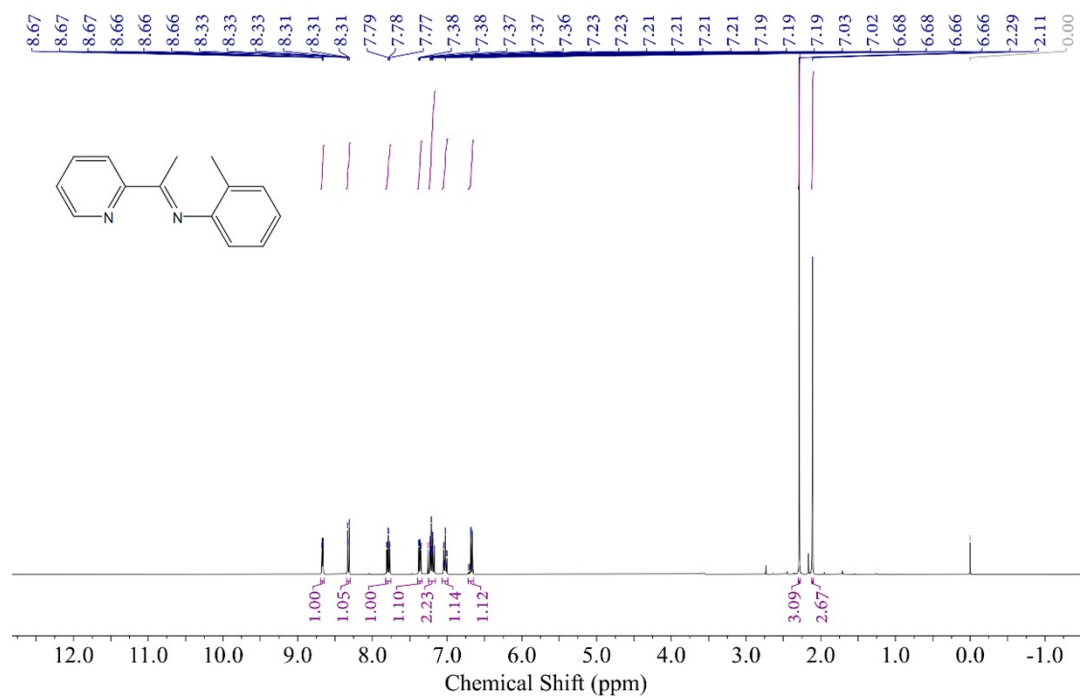

**Figure S2**  $^1\text{H}$  NMR spectrum of pro-ligand pyridine-2-C(Me)=N(2-(Me)C<sub>6</sub>H<sub>4</sub>) (**2**).

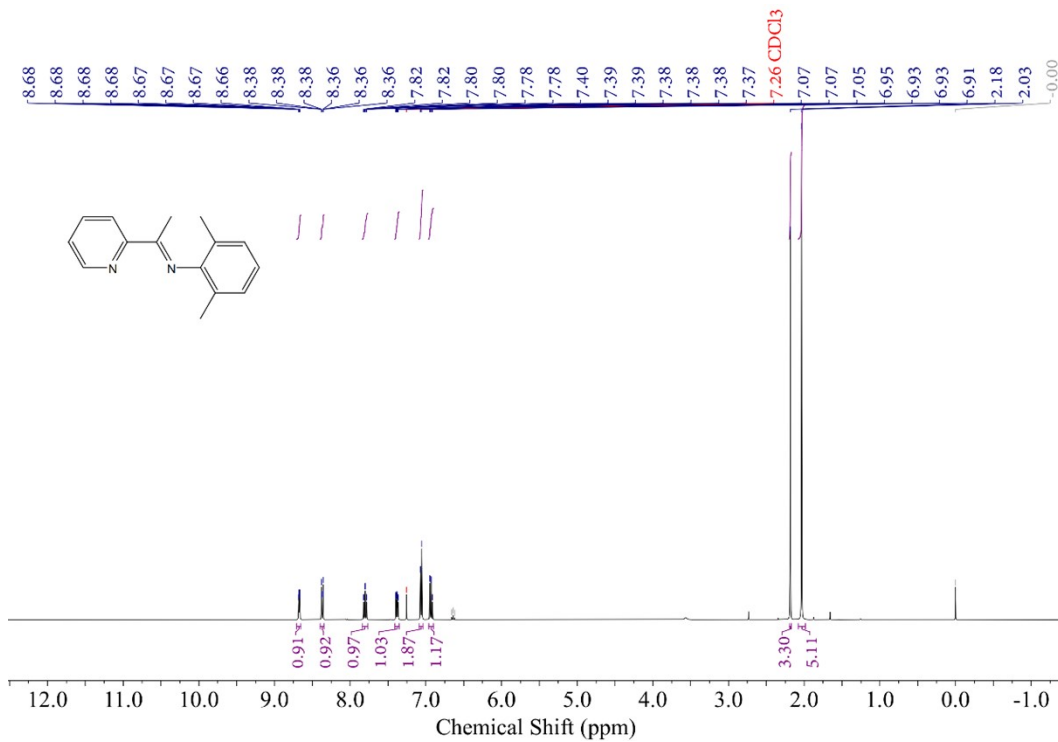

**Figure S3**  $^1\text{H}$  NMR spectrum of pro-ligand pyridine-2-C(Me)=N(2,6-(Me) $_2$ C $_6$ H $_3$ ) (**3**).

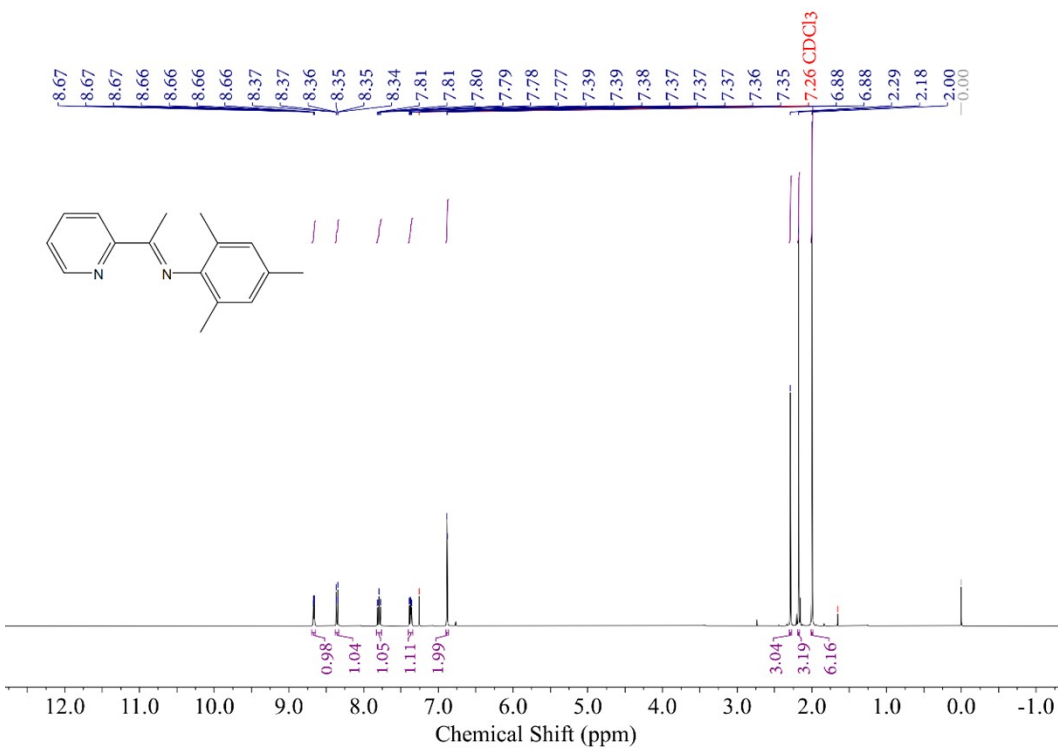

**Figure S4**  $^1\text{H}$  NMR spectrum of pro-ligand pyridine-2-C(Me)=N(2,4,6-(Me) $_3$ C $_6$ H $_2$ ) (**4**).

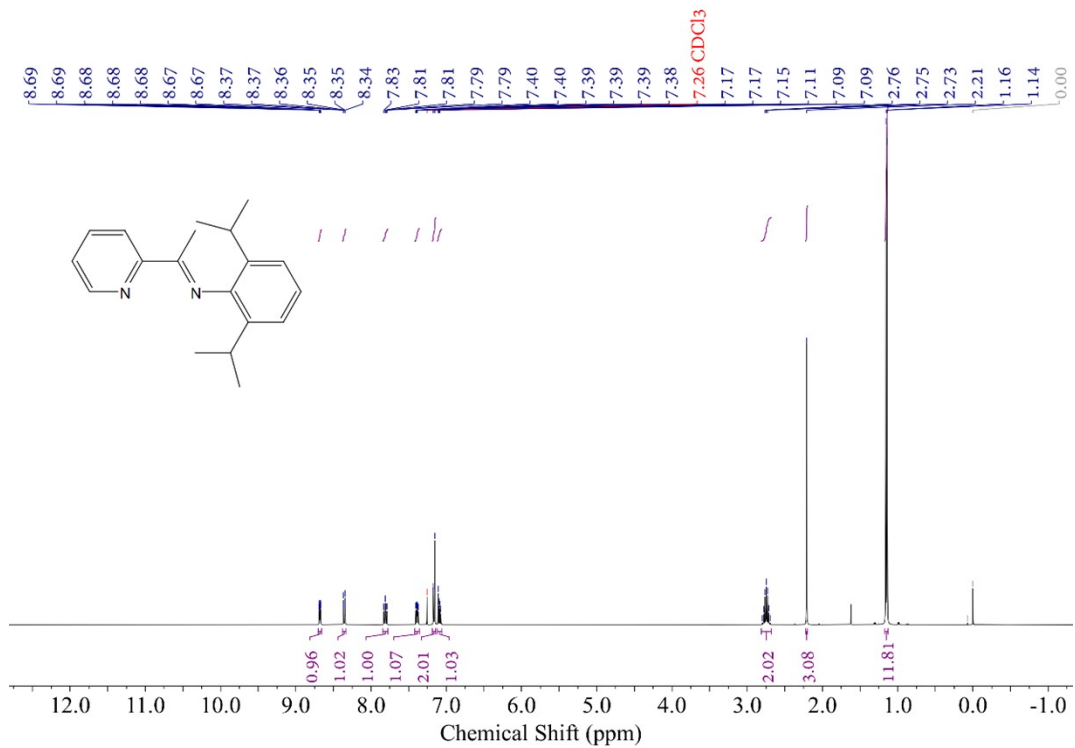

**Figure S5** <sup>1</sup>H NMR spectrum of pro-ligand pyridine-2-C(Me)=N(2,6-(*i*-Pr)<sub>2</sub>C<sub>6</sub>H<sub>3</sub>) (**5**).

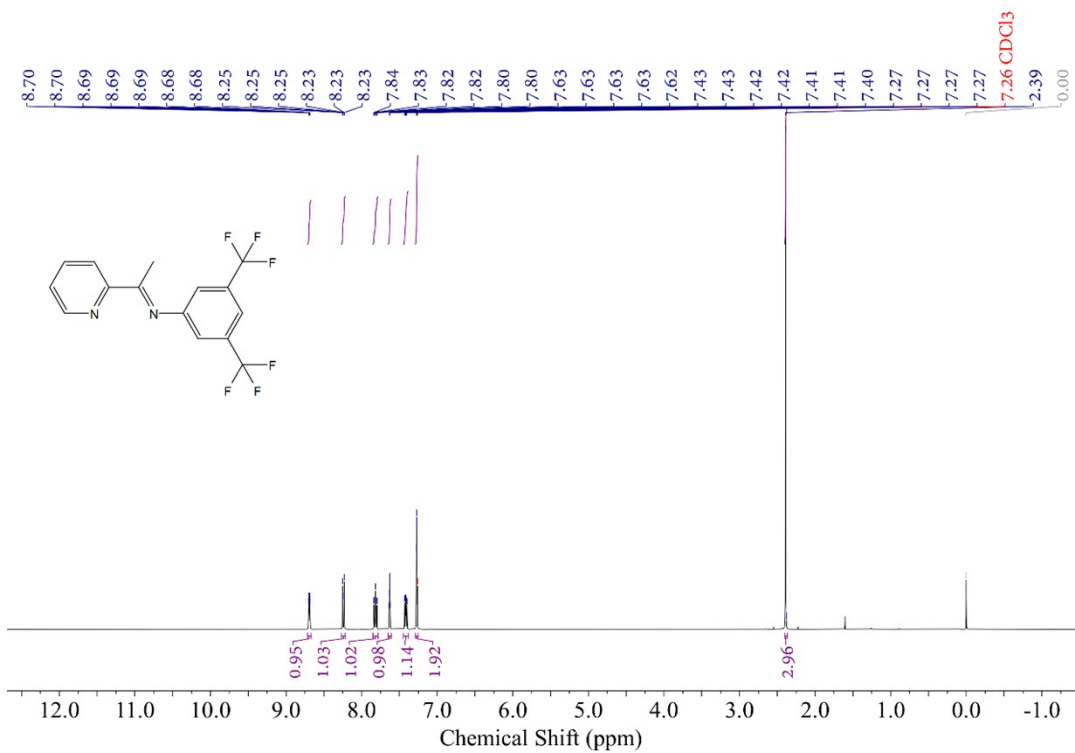

**Figure S6** <sup>1</sup>H NMR spectrum of pro-ligand pyridine-2-C(Me)=N(3,5-(CF<sub>3</sub>)<sub>2</sub>C<sub>6</sub>H<sub>3</sub>) (**6**).

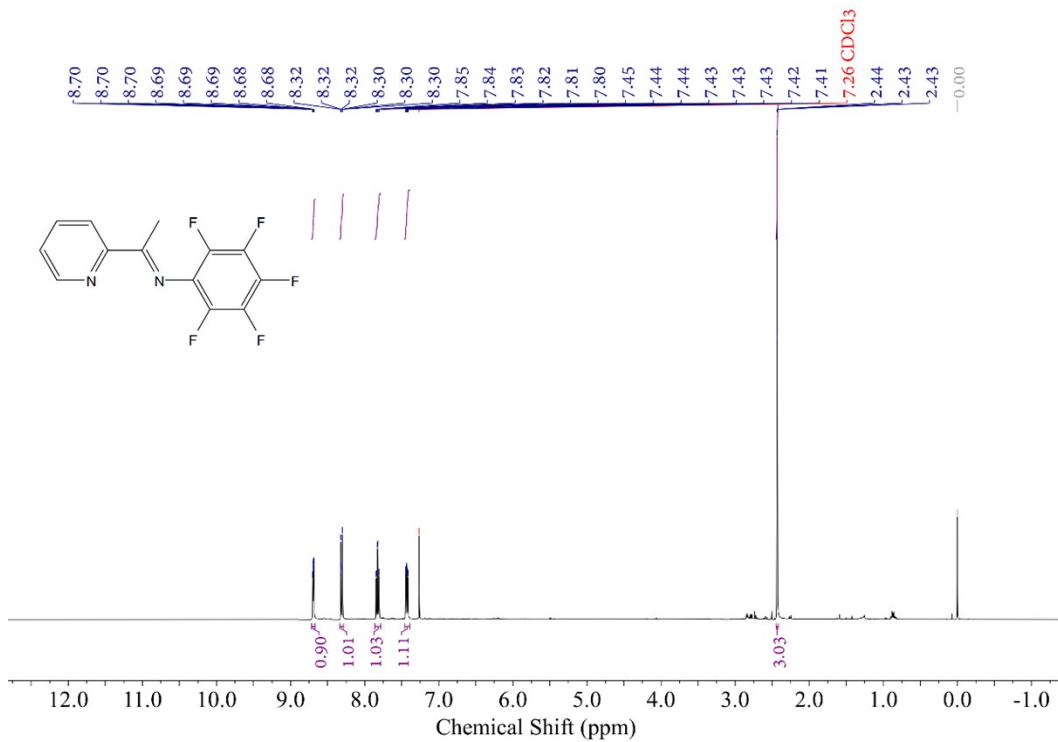

**Figure S7**  $^1\text{H}$  NMR spectrum of pro-ligand pyridine-2-C(Me)=N(C<sub>6</sub>F<sub>5</sub>) (**7**).

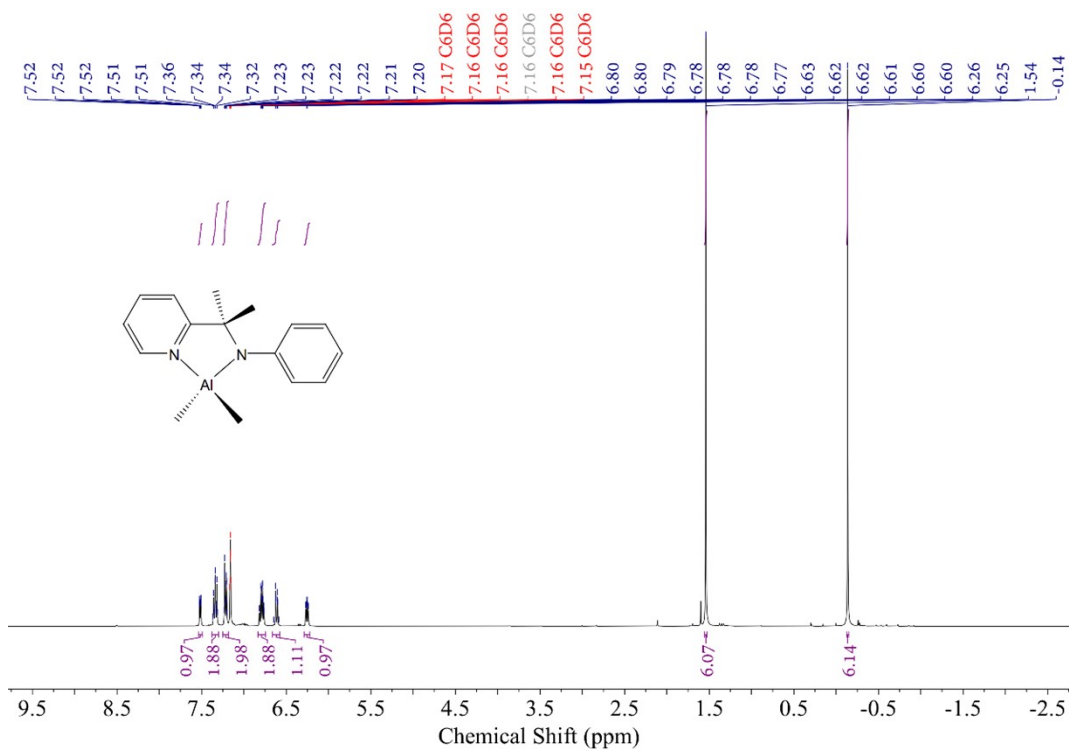

**Figure S8**  $^1\text{H}$  NMR spectrum of aluminum complex [pyridine-2-CMe<sub>2</sub>N(Ph)- $\kappa^2\text{N},\text{N}'$ ]AlMe<sub>2</sub> (**1a**).

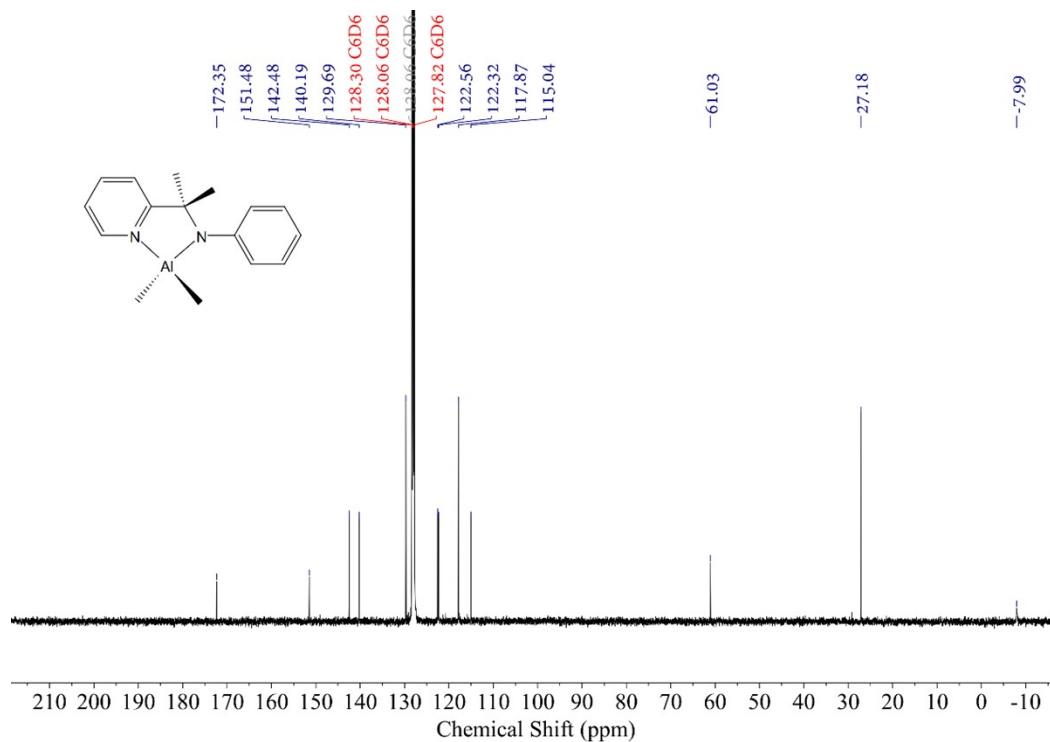

**Figure S9** <sup>13</sup>C NMR spectrum of aluminum complex [pyridine-2-CMe<sub>2</sub>N(Ph)-κ<sup>2</sup>N,N']AlMe<sub>2</sub> (**1a**).

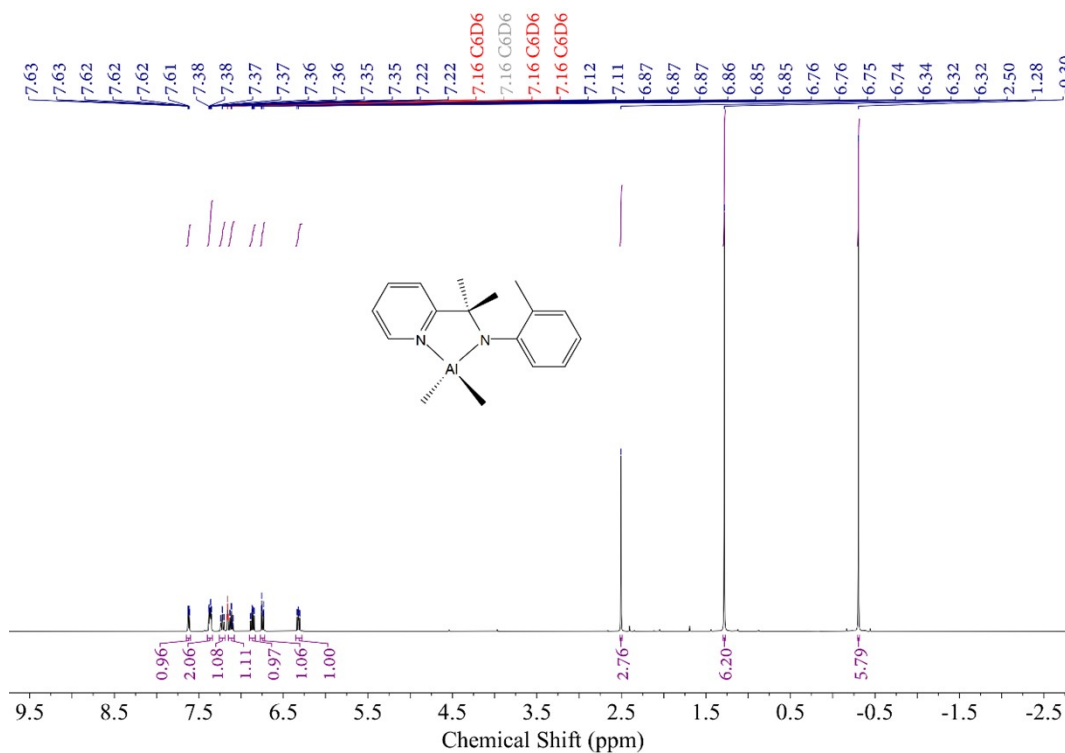

**Figure S10** <sup>1</sup>H NMR spectrum of aluminum complex [pyridine-2-CMe<sub>2</sub>N(2-(Me)C<sub>6</sub>H<sub>4</sub>)-

κ<sup>2</sup>N,N']AlMe<sub>2</sub> (**2a**).

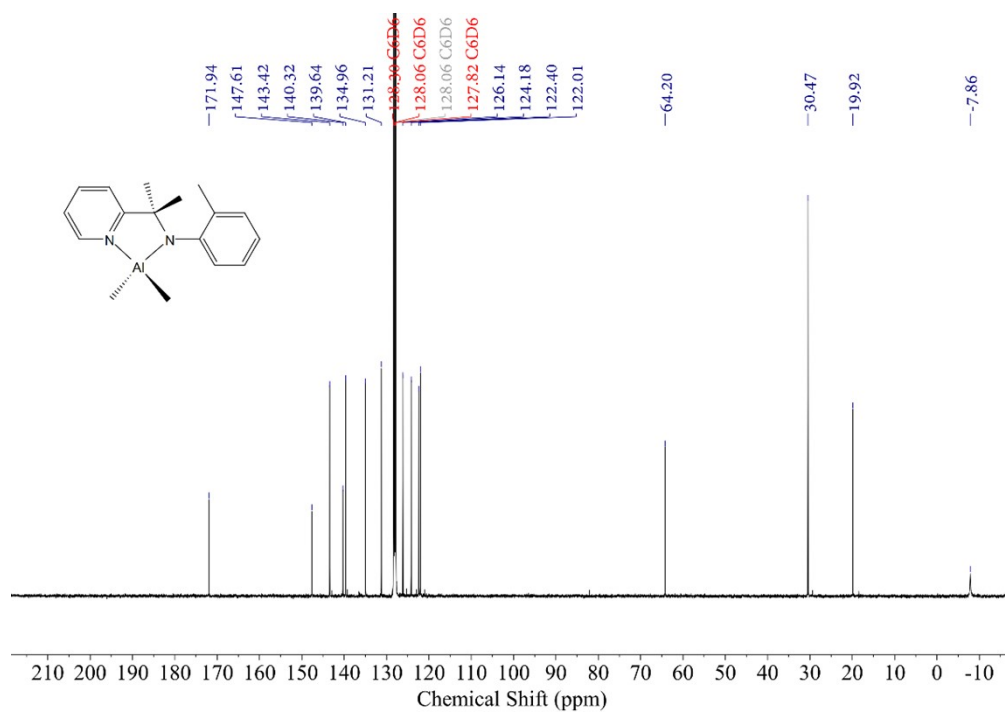

**Figure S11**  $^{13}\text{C}$  NMR spectrum of aluminum complex [pyridine-2- $\text{CMe}_2\text{N}(2\text{-(Me)C}_6\text{H}_4\text{)-}\kappa^2\text{N,N}'\text{AlMe}_2$  (**2a**).

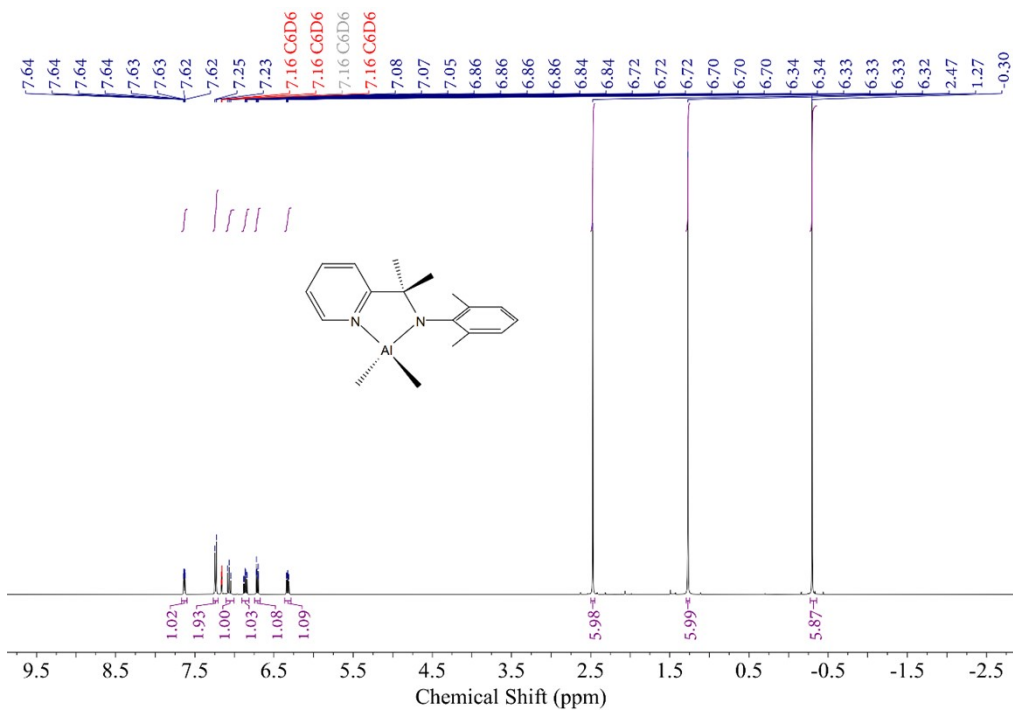

**Figure S12**  $^1\text{H}$  NMR spectrum of aluminum complex [pyridine-2- $\text{CMe}_2\text{N}(2,6\text{-(Me)}_2\text{C}_6\text{H}_3\text{)-}\kappa^2\text{N,N}'\text{AlMe}_2$  (**3a**).

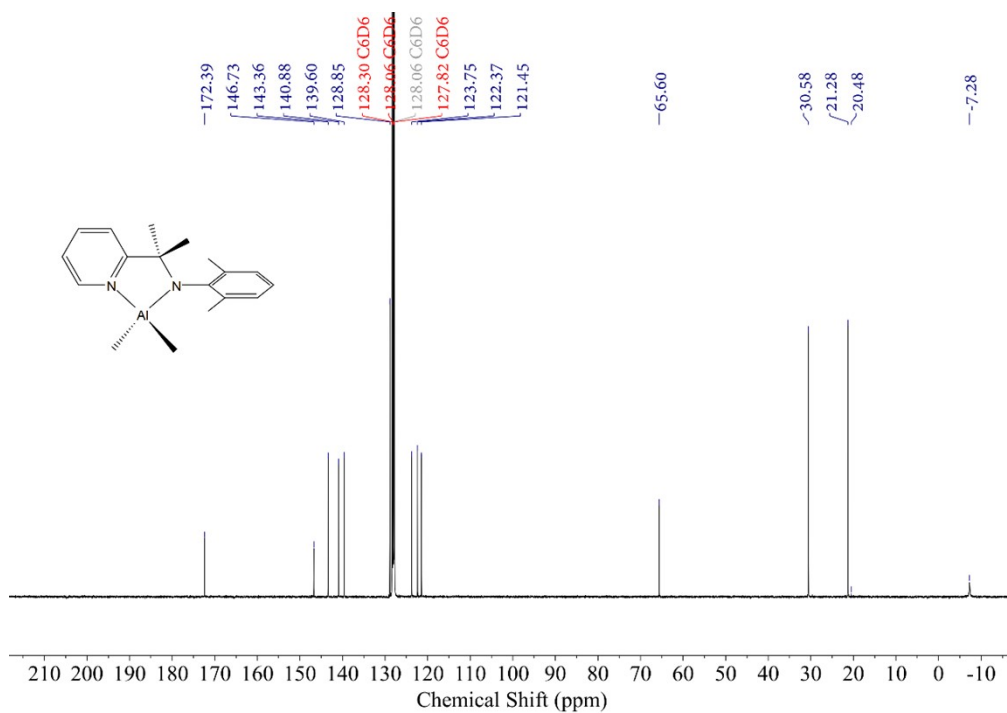

**Figure S13** <sup>13</sup>C NMR spectrum of aluminum complex [pyridine-2-CMe<sub>2</sub>N(2,6-(Me)<sub>2</sub>C<sub>6</sub>H<sub>3</sub>)-κ<sup>2</sup>N,N']AlMe<sub>2</sub> (**3a**).

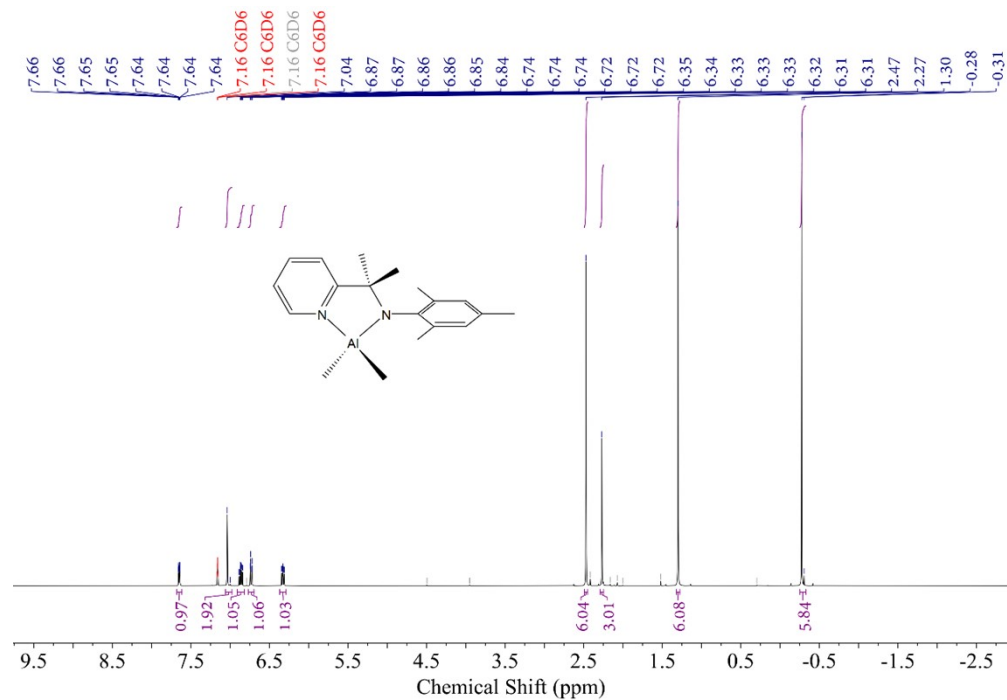

**Figure S14** <sup>1</sup>H NMR spectrum of aluminum complex [pyridine-2-CMe<sub>2</sub>N(2,4,6-(Me)<sub>3</sub>C<sub>6</sub>H<sub>2</sub>)-κ<sup>2</sup>N,N']AlMe<sub>2</sub> (**4a**).



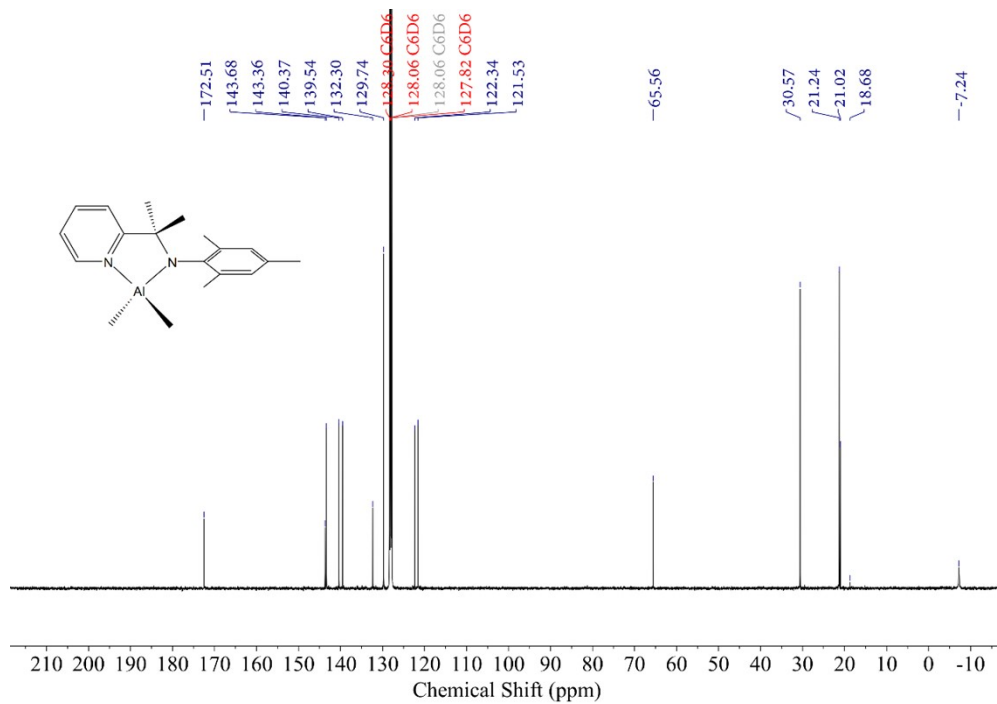

**Figure S15**  $^{13}\text{C}$  NMR spectrum of aluminum complex [pyridine-2-CMe<sub>2</sub>N(2,4,6-(Me)<sub>3</sub>C<sub>6</sub>H<sub>2</sub>)-

$\kappa^2\text{N,N}'$ ]AlMe<sub>2</sub> (**4a**).

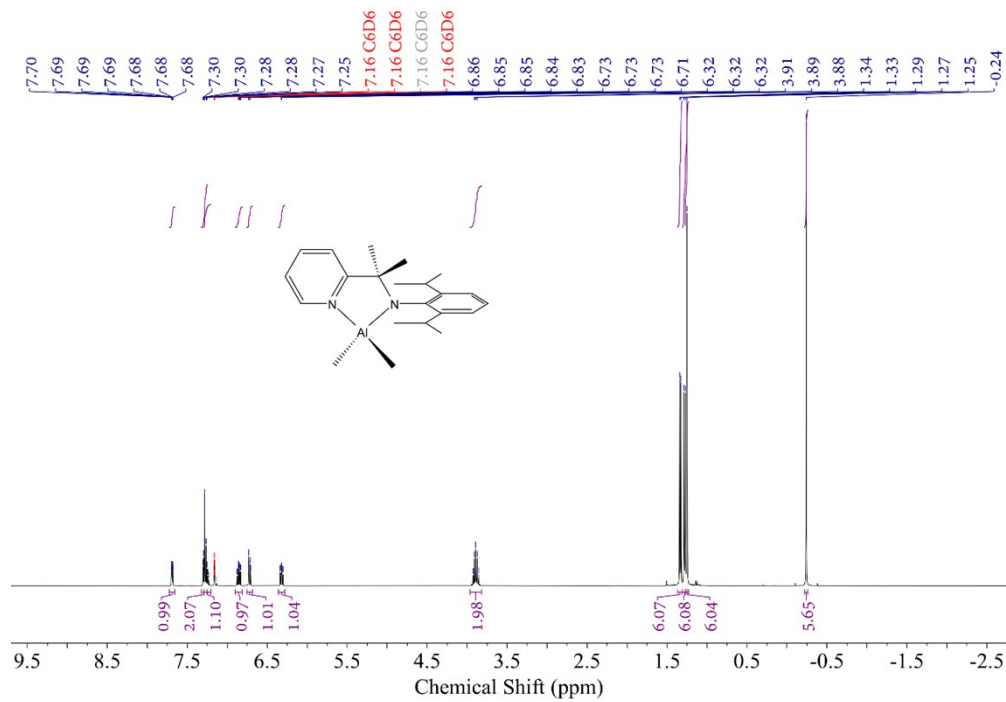

**Figure S16**  $^1\text{H}$  NMR spectrum of aluminum complex [pyridine-2-CMe<sub>2</sub>N(2,6-(<sup>i</sup>Pr)<sub>2</sub>C<sub>6</sub>H<sub>3</sub>)-

$\kappa^2\text{N,N}'$ ]AlMe<sub>2</sub> (**5a**).

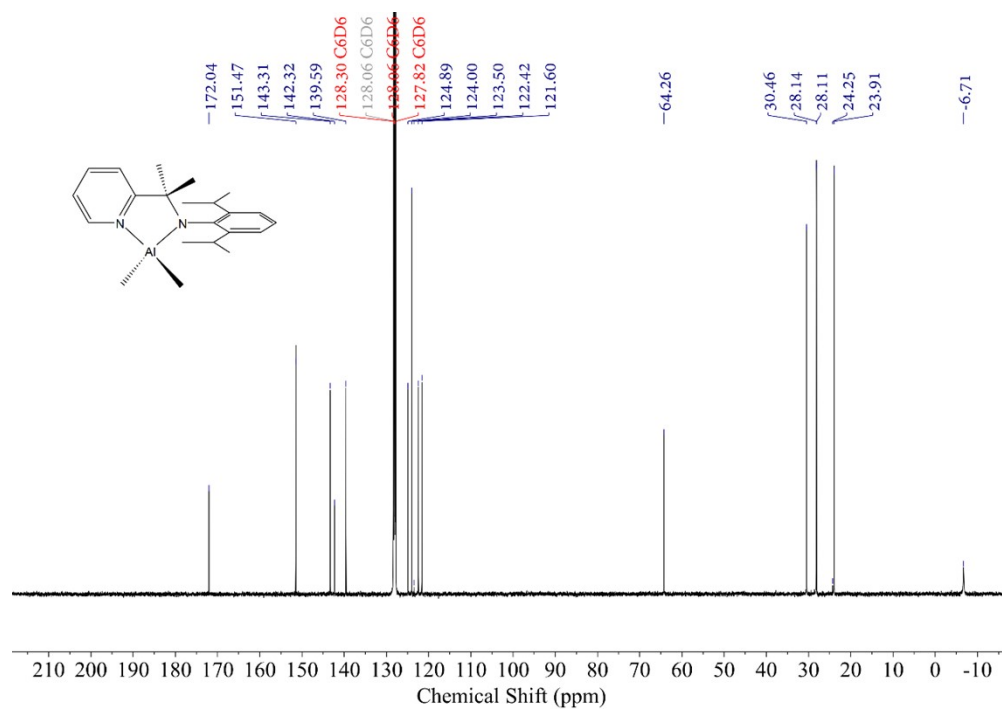

**Figure S17**  $^{13}\text{C}$  NMR spectrum of aluminum complex [pyridine-2- $\text{CMe}_2\text{N}(2,6\text{-}i\text{Pr})_2\text{C}_6\text{H}_3$ )-

$\kappa^2\text{N}_2\text{N}'\text{AlMe}_2$  (**5a**).

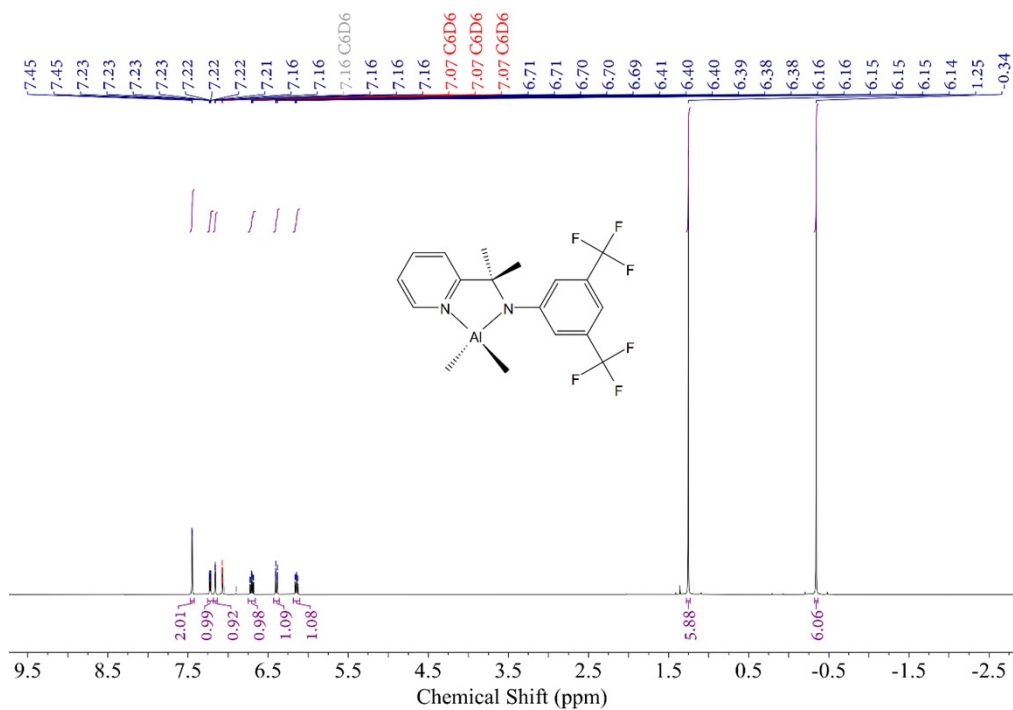

**Figure S18**  $^1\text{H}$  NMR spectrum of aluminum complex [pyridine-2- $\text{CMe}_2\text{N}(3,5\text{-(CF}_3)_2\text{C}_6\text{H}_3$ )-

$\kappa^2\text{N}_2\text{N}'\text{AlMe}_2$  (**6a**).

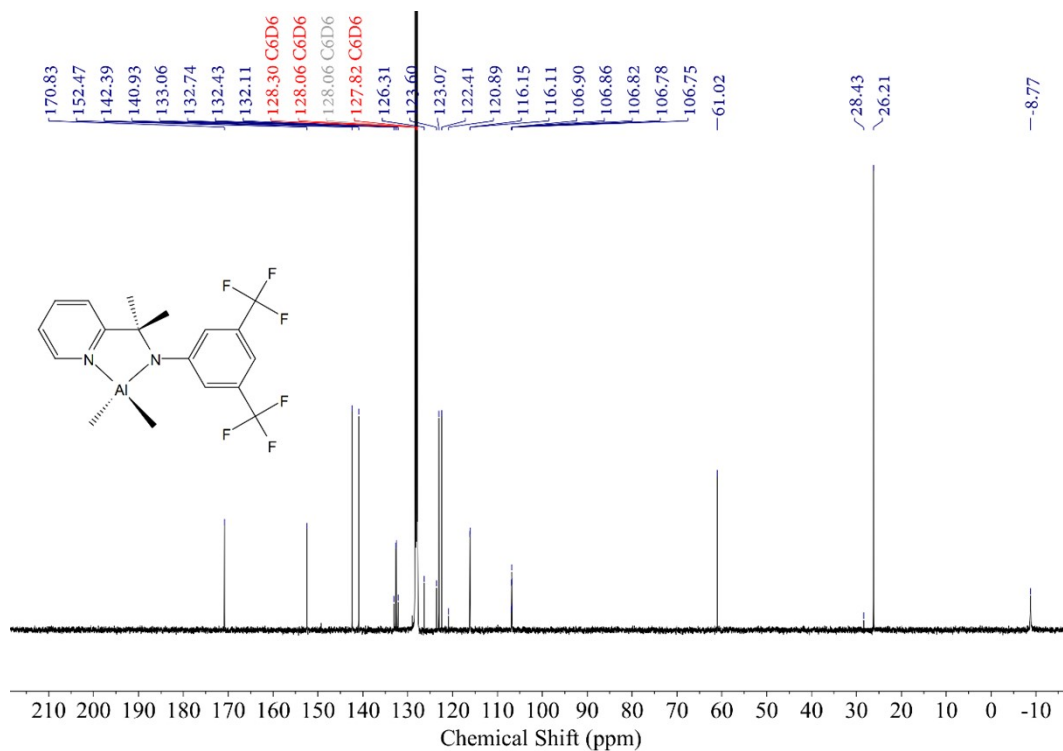

**Figure S19**  $^{13}\text{C}$  NMR spectrum of aluminum complex [pyridine-2- $\text{CMe}_2\text{N}(3,5\text{-(CF}_3)_2\text{C}_6\text{H}_3\text{)-}\kappa^2\text{N,N}'\text{]AlMe}_2$  (**6a**).

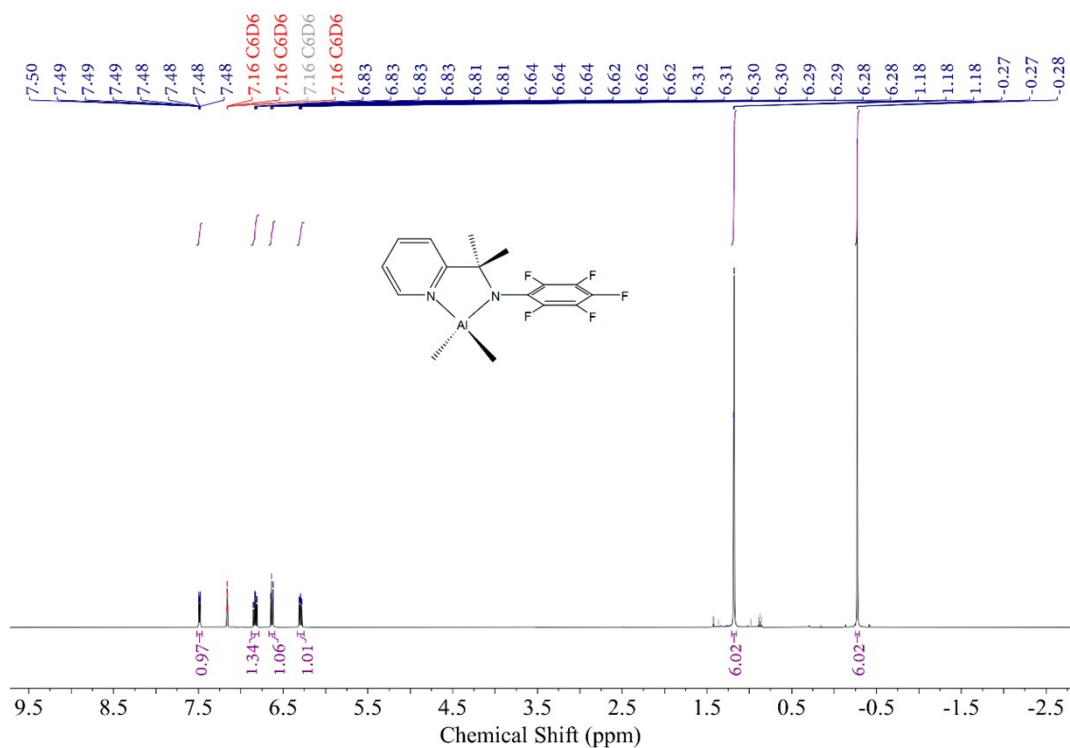

**Figure S20**  $^1\text{H}$  NMR spectrum of aluminum complex [pyridine-2- $\text{CMe}_2\text{N}(\text{C}_6\text{F}_5\text{)-}\kappa^2\text{N,N}'\text{]AlMe}_2$  (**7a**).

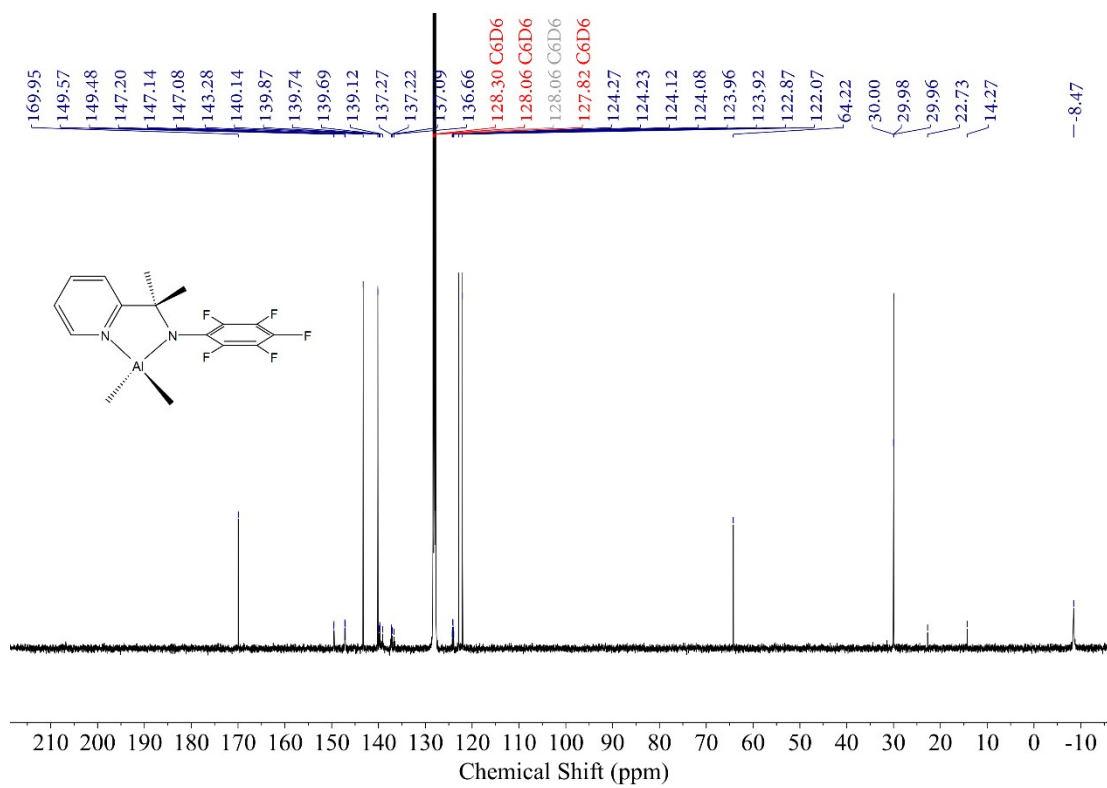

**Figure S21**  $^{13}\text{C}$  NMR spectrum of aluminum complex [pyridine-2- $\text{CMe}_2\text{N}(\text{C}_6\text{F}_5)\text{-}\kappa^2\text{N,N}'$ ]AlMe $_2$  (**7a**).

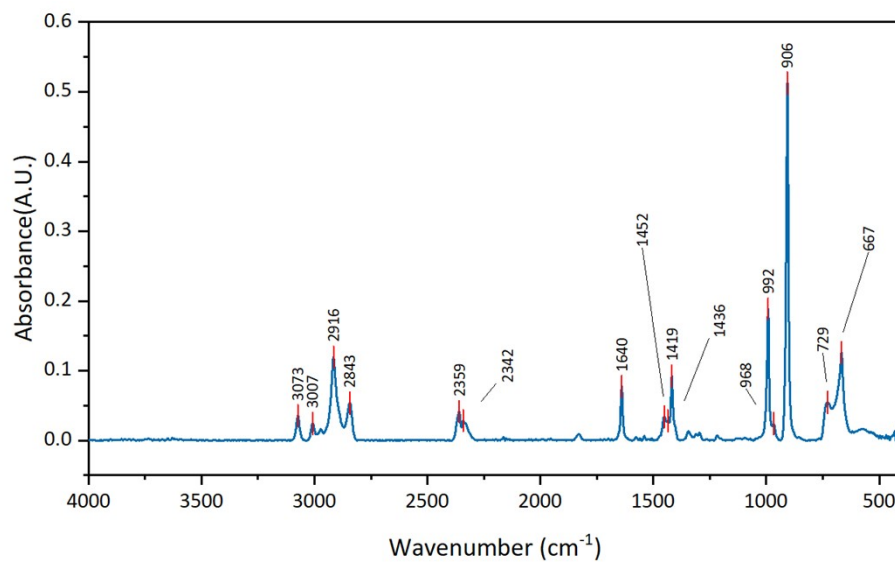

**Figure S22.** FTIR spectrum of polybutadiene (Table 1, entry 1).

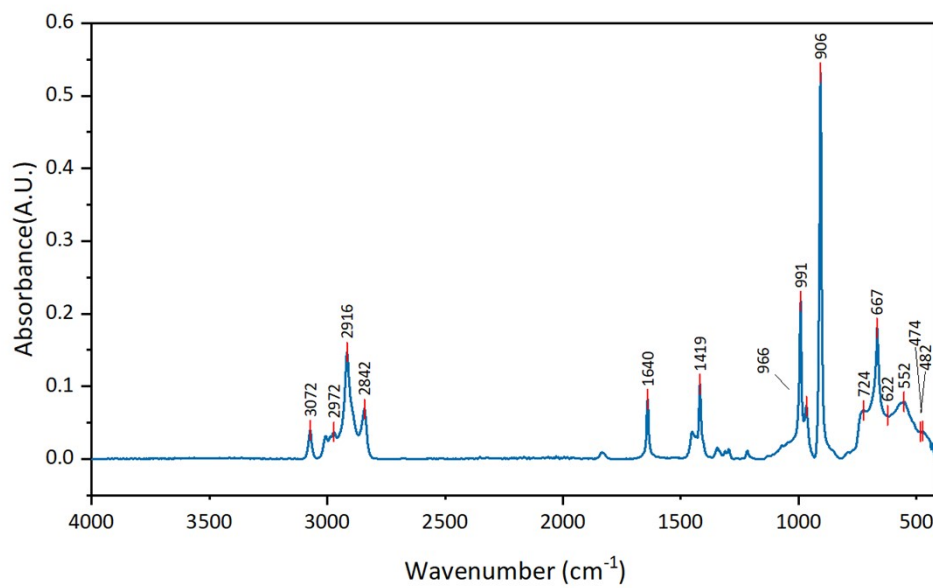

**Figure S23.** FTIR spectrum of polybutadiene (Table 1, entry 2).

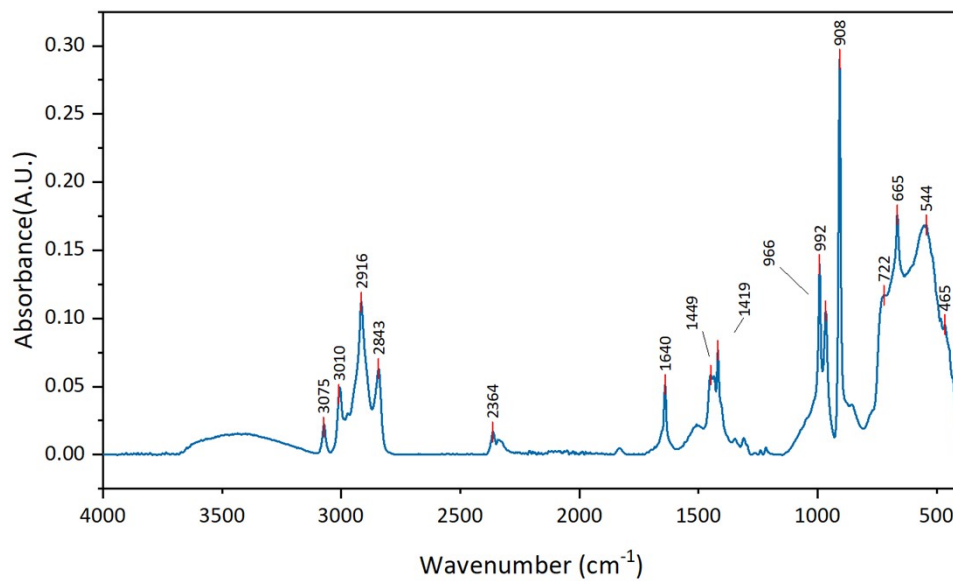

**Figure S24.** FTIR spectrum of polybutadiene (Table 1, entry 3).

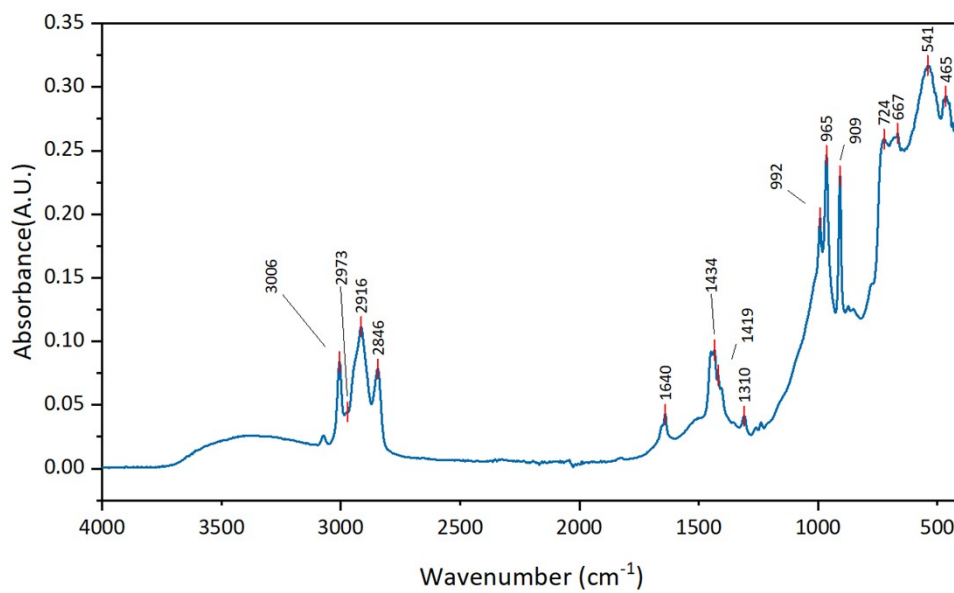

**Figure S25.** FTIR spectrum of polybutadiene (Table 1, entry 4).

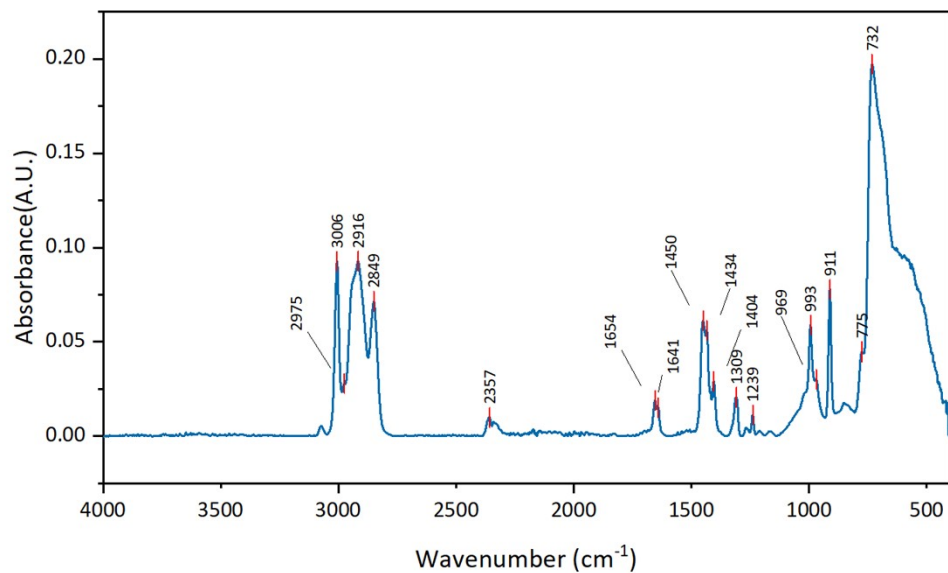

**Figure S26.** FTIR spectrum of polybutadiene (Table 1, entry 5).

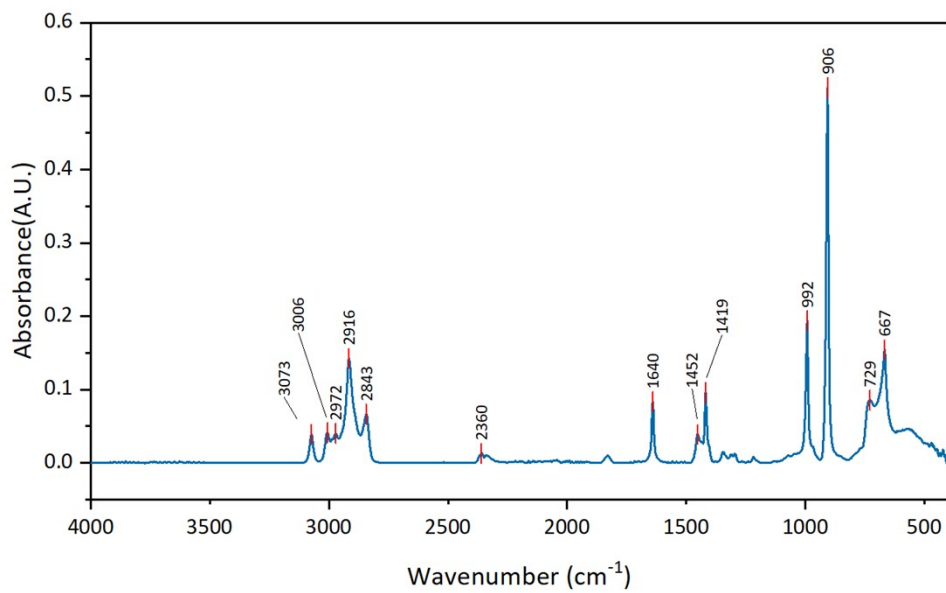

**Figure S27.** FTIR spectrum of polybutadiene (Table 1, entry 6).

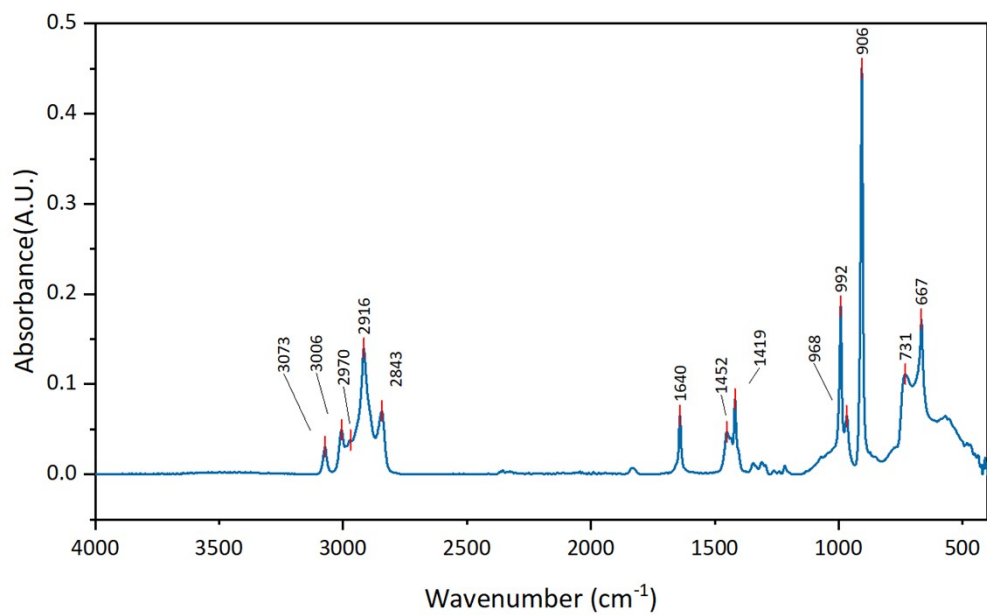

**Figure S28.** FTIR spectrum of polybutadiene (Table 1, entry 7).

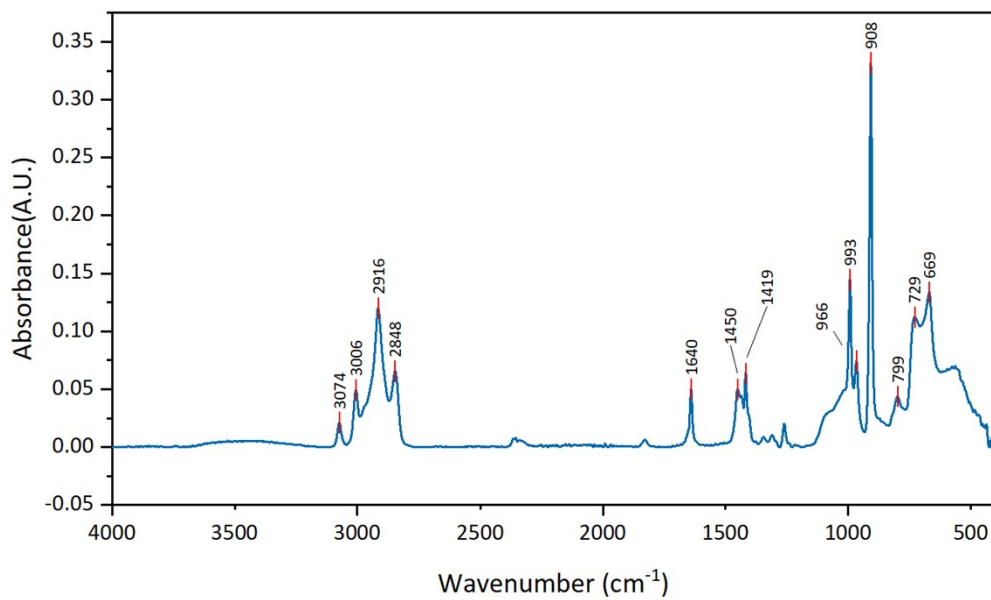

**Figure S29.** FTIR spectrum of polybutadiene (Table 1, entry 8).



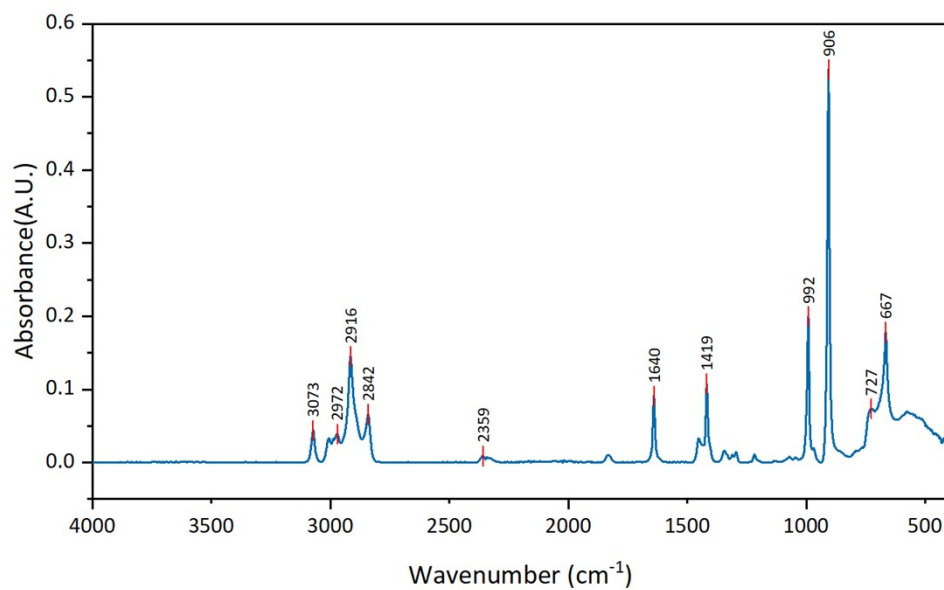

**Figure S30.** FTIR spectrum of polybutadiene (Table 2, entry 1).

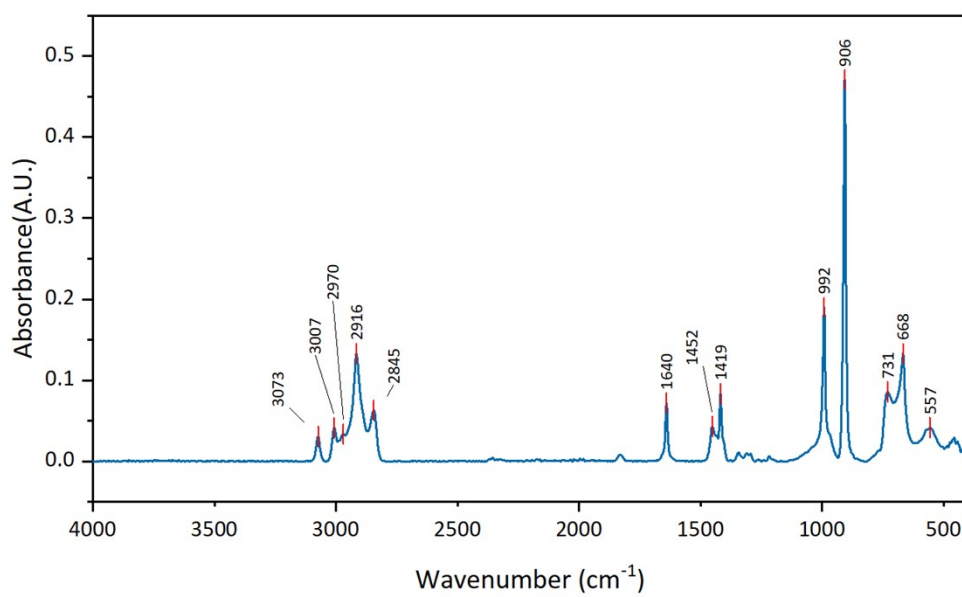

**Figure S31.** FTIR spectrum of polybutadiene (Table 2, entry 2).

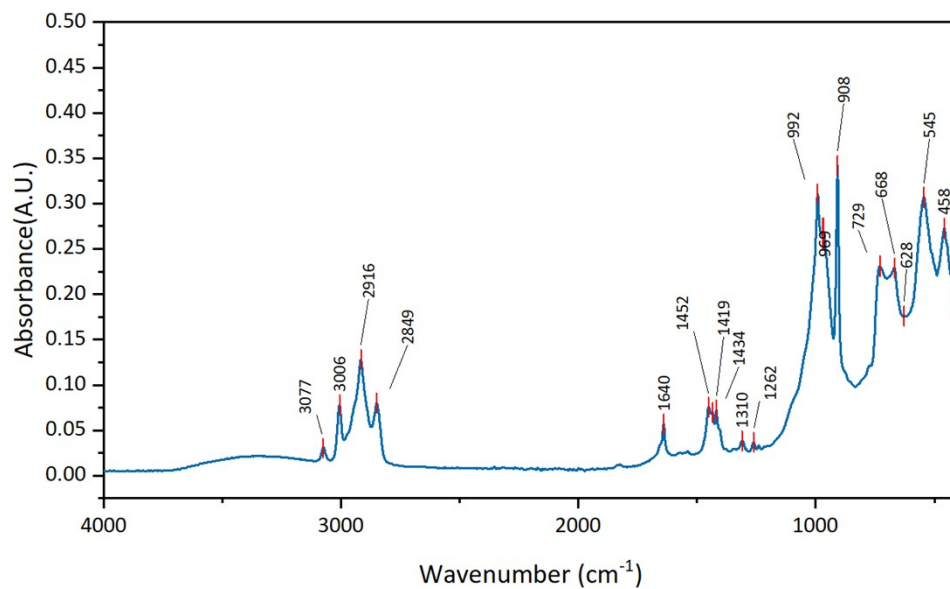

**Figure S32.** FTIR spectrum of polybutadiene (Table 2, entry 3).

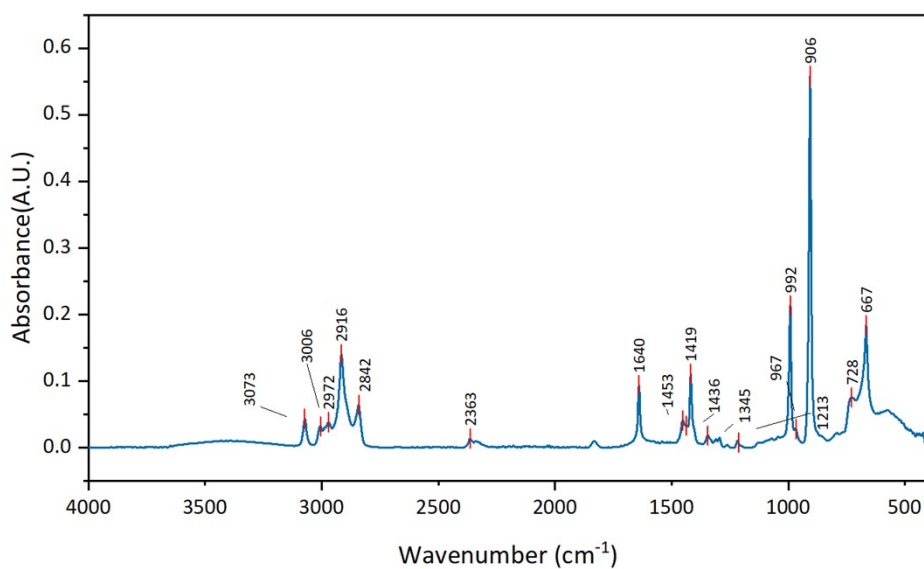

**Figure S33.** FTIR spectrum of polybutadiene (Table 2, entry 4).

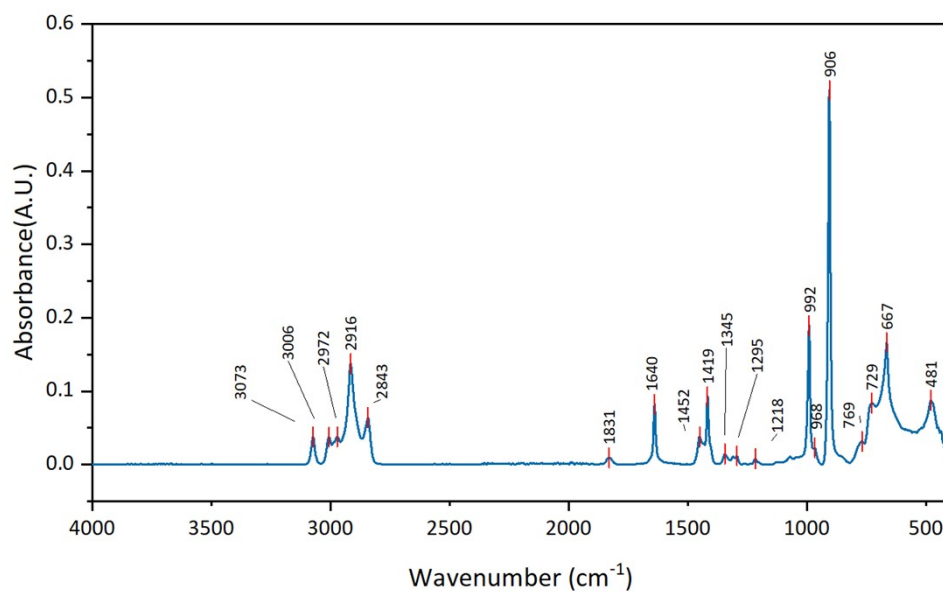

**Figure S34.** FTIR spectrum of polybutadiene (Table 2, entry 5).

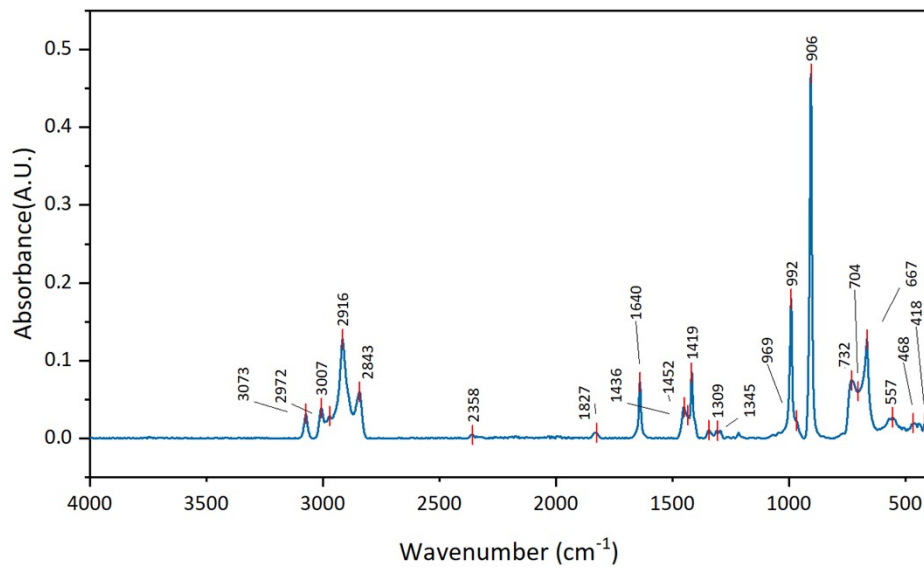

**Figure S35.** FTIR spectrum of polybutadiene (Table 2, entry 6).

**Table S1.** ICP-OES analysis data of the complex **7a**

| <b>elements</b> | <b>conc. (ppm)</b> |
|-----------------|--------------------|
| Be              | 0.07               |
| Na              | 74.26              |
| Mg              | 50.05              |
| K               | 91.05              |
| Ca              | 58.70              |
| Ti              | 2.37               |
| V               | 0.09               |
| Cr              | 2.22               |
| Mn              | 0.06               |
| Fe              | 22.72              |
| Co              | 0.13               |
| Ni              | 1.10               |
| Cu              | 1.25               |
| Zn              | 116.91             |
| Ga              | 0.03               |
| As              | 0.06               |
| Se              | 1.31               |
| Rb              | 0.02               |
| Sr              | 1.08               |
| Zr              | 0.03               |
| Mo              | 0.30               |
| Ag              | 0.22               |
| Cd              | 0.05               |
| Sn              | 0.13               |
| Sb              | 0.11               |
| Cs              | 0.00               |
| Ba              | 2.89               |
| Pb              | 0.21               |
| Be              | 0.07               |

**Table S2.** Crystal data and structure refinement for Al complex **1a**.

| <b>entry</b>                                                  | <b>data</b>                                                   |
|---------------------------------------------------------------|---------------------------------------------------------------|
| empirical formula                                             | C <sub>16</sub> H <sub>21</sub> AlN <sub>2</sub>              |
| formula weight                                                | 268.33                                                        |
| CCDC number                                                   | 2128578                                                       |
| temperature (K)                                               | 298.15                                                        |
| crystal system                                                | monoclinic                                                    |
| space group                                                   | P2 <sub>1</sub> /n                                            |
| a (Å)                                                         | 8.3546(6)                                                     |
| b (Å)                                                         | 10.7094(8)                                                    |
| c (Å)                                                         | 17.5246(12)                                                   |
| α (°)                                                         | 90                                                            |
| β (°)                                                         | 97.6480(10)                                                   |
| γ (°)                                                         | 90                                                            |
| volume (Å <sup>3</sup> )                                      | 1554.03(19)                                                   |
| Z                                                             | 4                                                             |
| ρ <sub>calcd.</sub> (Mg m <sup>-3</sup> )                     | 1.147                                                         |
| μ (mm <sup>-1</sup> )                                         | 0.120                                                         |
| F(000)                                                        | 576.0                                                         |
| crystal size (mm)                                             | 0.21 × 0.2 × 0.19                                             |
| 2θ range (°)                                                  | 4.468 to 54.96                                                |
| index ranges                                                  | -10 ≤ h ≤ 10, -13 ≤ k ≤ 13, -22 ≤ l ≤ 22                      |
| reflections collected                                         | 17321                                                         |
| independent reflections                                       | 3538 [R <sub>int</sub> = 0.0398, R <sub>sigma</sub> = 0.0403] |
| data/restraints/parameters                                    | 3538/0/176                                                    |
| goodness-of-fit on F <sup>2</sup>                             | 1.026                                                         |
| final R indexes [I ≥ 2σ (I)]                                  | R1 = 0.0461, wR2 = 0.1184                                     |
| final R indexes [all data]                                    | R1 = 0.0701, wR2 = 0.1302                                     |
| largest diff. peak and hole (e <sup>o</sup> Å <sup>-3</sup> ) | 0.21/-0.23                                                    |

**Table S3.** Crystal data and structure refinement for Al complex **3a**.

| <b>entry</b>                                                  | <b>data</b>                                                   |
|---------------------------------------------------------------|---------------------------------------------------------------|
| empirical formula                                             | C <sub>18</sub> H <sub>25</sub> AlN <sub>2</sub>              |
| formula weight                                                | 296.38                                                        |
| CCDC number                                                   | 2175057                                                       |
| temperature (K)                                               | 298.15                                                        |
| crystal system                                                | orthorhombic                                                  |
| space group                                                   | P2 <sub>1</sub> 2 <sub>1</sub> 2 <sub>1</sub>                 |
| a (Å)                                                         | 8.8305(14)                                                    |
| b (Å)                                                         | 12.0231(19)                                                   |
| c (Å)                                                         | 16.870(3)                                                     |
| α (°)                                                         | 90                                                            |
| β (°)                                                         | 90                                                            |
| γ (°)                                                         | 90                                                            |
| volume (Å <sup>3</sup> )                                      | 1791.1(5)                                                     |
| Z                                                             | 4                                                             |
| ρ <sub>calcd.</sub> (Mg m <sup>-3</sup> )                     | 1.099                                                         |
| μ (mm <sup>-1</sup> )                                         | 0.110                                                         |
| F(000)                                                        | 640.0                                                         |
| crystal size (mm)                                             | 0.22 × 0.12 × 0.1                                             |
| 2θ range (°)                                                  | 4.16 to 55.06                                                 |
| index ranges                                                  | -11 ≤ h ≤ 11, -15 ≤ k ≤ 15, -21 ≤ l ≤ 21                      |
| reflections collected                                         | 20576                                                         |
| independent reflections                                       | 4005 [R <sub>int</sub> = 0.1136, R <sub>sigma</sub> = 0.1118] |
| data/restraints/parameters                                    | 4005/0/197                                                    |
| goodness-of-fit on F <sup>2</sup>                             | 1.002                                                         |
| final R indexes [I ≥ 2σ (I)]                                  | R1 = 0.0567, wR2 = 0.1001                                     |
| final R indexes [all data]                                    | R1 = 0.1579, wR2 = 0.1251                                     |
| largest diff. peak and hole (e <sup>o</sup> Å <sup>-3</sup> ) | 0.14/-0.15                                                    |
| Flack parameter                                               | 0.4(2)                                                        |

**Table S4.** Crystal data and structure refinement for Al complex **4a**.

| <b>entry</b>                                                  | <b>data</b>                                                   |
|---------------------------------------------------------------|---------------------------------------------------------------|
| empirical formula                                             | C <sub>19</sub> H <sub>27</sub> AlN <sub>2</sub>              |
| formula weight                                                | 310.40                                                        |
| CCDC number                                                   | 2175058                                                       |
| temperature (K)                                               | 300.00                                                        |
| crystal system                                                | orthorhombic                                                  |
| space group                                                   | P2 <sub>1</sub> 2 <sub>1</sub> 2 <sub>1</sub>                 |
| a (Å)                                                         | 8.0744(4)                                                     |
| b (Å)                                                         | 12.6305(8)                                                    |
| c (Å)                                                         | 18.8429(11)                                                   |
| α (°)                                                         | 90                                                            |
| β (°)                                                         | 90                                                            |
| γ (°)                                                         | 90                                                            |
| volume (Å <sup>3</sup> )                                      | 1921.67(19)                                                   |
| Z                                                             | 4                                                             |
| ρ <sub>calcd.</sub> (Mg m <sup>-3</sup> )                     | 1.073                                                         |
| μ (mm <sup>-1</sup> )                                         | 0.105                                                         |
| F(000)                                                        | 672.0                                                         |
| crystal size (mm)                                             | 0.23 × 0.21 × 0.19                                            |
| 2θ range (°)                                                  | 5.394 to 57.652                                               |
| index ranges                                                  | -10 ≤ h ≤ 9, -16 ≤ k ≤ 16, -25 ≤ l ≤ 25                       |
| reflections collected                                         | 64951                                                         |
| independent reflections                                       | 4863 [R <sub>int</sub> = 0.0837, R <sub>sigma</sub> = 0.0372] |
| data/restraints/parameters                                    | 4863/0/206                                                    |
| goodness-of-fit on F <sup>2</sup>                             | 1.030                                                         |
| final R indexes [I ≥ 2σ (I)]                                  | R1 = 0.0504, wR2 = 0.1168                                     |
| final R indexes [all data]                                    | R1 = 0.0853, wR2 = 0.1332                                     |
| largest diff. peak and hole (e <sup>o</sup> Å <sup>-3</sup> ) | 0.18/-0.27                                                    |
| Flack parameter                                               | 0.00(5)                                                       |

**Table S5.** Crystal data and structure refinement for Al complex **5a**.

| <b>entry</b>                                                  | <b>data</b>                                                   |
|---------------------------------------------------------------|---------------------------------------------------------------|
| empirical formula                                             | C <sub>22</sub> H <sub>33</sub> AlN <sub>2</sub>              |
| formula weight                                                | 352.48                                                        |
| CCDC number                                                   | 2175059                                                       |
| temperature (K)                                               | 300.00                                                        |
| crystal system                                                | monoclinic                                                    |
| space group                                                   | P2 <sub>1</sub> /n                                            |
| a (Å)                                                         | 8.6071(14)                                                    |
| b (Å)                                                         | 16.636(3)                                                     |
| c (Å)                                                         | 15.272(3)                                                     |
| α (°)                                                         | 90                                                            |
| β (°)                                                         | 91.136(6)                                                     |
| γ (°)                                                         | 90                                                            |
| volume (Å <sup>3</sup> )                                      | 2186.3(6)                                                     |
| Z                                                             | 4                                                             |
| ρ <sub>calcd.</sub> (Mg m <sup>-3</sup> )                     | 1.071                                                         |
| μ (mm <sup>-1</sup> )                                         | 0.099                                                         |
| F(000)                                                        | 768.0                                                         |
| crystal size (mm)                                             | 0.25 × 0.15 × 0.12                                            |
| 2θ range (°)                                                  | 5.33 to 49.996                                                |
| index ranges                                                  | -10 ≤ h ≤ 9, -19 ≤ k ≤ 19, -18 ≤ l ≤ 18                       |
| reflections collected                                         | 28010                                                         |
| independent reflections                                       | 3801 [R <sub>int</sub> = 0.1456, R <sub>sigma</sub> = 0.0838] |
| data/restraints/parameters                                    | 3801/0/235                                                    |
| goodness-of-fit on F <sup>2</sup>                             | 1.055                                                         |
| final R indexes [I ≥ 2σ (I)]                                  | R1 = 0.0722, wR2 = 0.1730                                     |
| final R indexes [all data]                                    | R1 = 0.1409, wR2 = 0.2165                                     |
| largest diff. peak and hole (e <sup>o</sup> Å <sup>-3</sup> ) | 0.20/-0.22                                                    |



**Table S6.** Crystal data and structure refinement for Al complex **6a**.

| <b>entry</b>                                                  | <b>data</b>                                                     |
|---------------------------------------------------------------|-----------------------------------------------------------------|
| empirical formula                                             | C <sub>18</sub> H <sub>19</sub> AlF <sub>6</sub> N <sub>2</sub> |
| formula weight                                                | 404.33                                                          |
| CCDC number                                                   | 2175060                                                         |
| temperature (K)                                               | 298.15                                                          |
| crystal system                                                | triclinic                                                       |
| space group                                                   | P1                                                              |
| a (Å)                                                         | 8.5573(6)                                                       |
| b (Å)                                                         | 8.8128(6)                                                       |
| c (Å)                                                         | 13.3517(9)                                                      |
| α (°)                                                         | 87.3090(10)                                                     |
| β (°)                                                         | 77.9280(10)                                                     |
| γ (°)                                                         | 89.4530(10)                                                     |
| volume (Å <sup>3</sup> )                                      | 983.55(12)                                                      |
| Z                                                             | 2                                                               |
| ρ <sub>calcd.</sub> (Mg m <sup>-3</sup> )                     | 1.365                                                           |
| μ (mm <sup>-1</sup> )                                         | 0.162                                                           |
| F(000)                                                        | 416.0                                                           |
| crystal size (mm)                                             | 0.13 × 0.12 × 0.11                                              |
| 2θ range (°)                                                  | 3.122 to 57.45                                                  |
| index ranges                                                  | -11 ≤ h ≤ 11, -11 ≤ k ≤ 11, -17 ≤ l ≤ 17                        |
| reflections collected                                         | 11894                                                           |
| independent reflections                                       | 4690 [R <sub>int</sub> = 0.0266, R <sub>sigma</sub> = 0.0348]   |
| data/restraints/parameters                                    | 4690/186/304                                                    |
| goodness-of-fit on F <sup>2</sup>                             | 1.034                                                           |
| final R indexes [I ≥ 2σ (I)]                                  | R1 = 0.0503, wR2 = 0.1280                                       |
| final R indexes [all data]                                    | R1 = 0.0801, wR2 = 0.1431                                       |
| largest diff. peak and hole (e <sup>o</sup> Å <sup>-3</sup> ) | 0.20/-0.21                                                      |

**Table S7.** Crystal data and structure refinement for Al complex **7a**.

| entry                                                         | data                                                            |
|---------------------------------------------------------------|-----------------------------------------------------------------|
| empirical formula                                             | C <sub>16</sub> H <sub>16</sub> AlF <sub>5</sub> N <sub>2</sub> |
| formula weight                                                | 358.29                                                          |
| CCDC number                                                   | 2175061                                                         |
| temperature (K)                                               | 298.15                                                          |
| crystal system                                                | monoclinic                                                      |
| space group                                                   | P2 <sub>1</sub> /n                                              |
| a (Å)                                                         | 14.4175(13)                                                     |
| b (Å)                                                         | 8.7391(8)                                                       |
| c (Å)                                                         | 14.9864(13)                                                     |
| α (°)                                                         | 90                                                              |
| β (°)                                                         | 110.1920(10)                                                    |
| γ (°)                                                         | 90                                                              |
| volume (Å <sup>3</sup> )                                      | 1772.2(3)                                                       |
| Z                                                             | 4                                                               |
| ρ <sub>calcd.</sub> (Mg m <sup>-3</sup> )                     | 1.343                                                           |
| μ (mm <sup>-1</sup> )                                         | 0.162                                                           |
| F(000)                                                        | 736.0                                                           |
| crystal size (mm)                                             | 0.2 × 0.17 × 0.15                                               |
|                                                               | MoKα (λ = 0.71073)                                              |
| 2θ range (°)                                                  | 3.38 to 55.01                                                   |
| index ranges                                                  | -18 ≤ h ≤ 18, -11 ≤ k ≤ 11, -19 ≤ l ≤ 19                        |
| reflections collected                                         | 20204                                                           |
| independent reflections                                       | 4069 [R <sub>int</sub> = 0.0332, R <sub>sigma</sub> = 0.0310]   |
| data/restraints/parameters                                    | 4069/0/221                                                      |
| goodness-of-fit on F <sup>2</sup>                             | 1.038                                                           |
| final R indexes [I ≥ 2σ (I)]                                  | R1 = 0.0518, wR2 = 0.1396                                       |
| final R indexes [all data]                                    | R1 = 0.0835, wR2 = 0.1584                                       |
| largest diff. peak and hole (e <sup>o</sup> A <sup>-3</sup> ) | 0.23/-0.23                                                      |

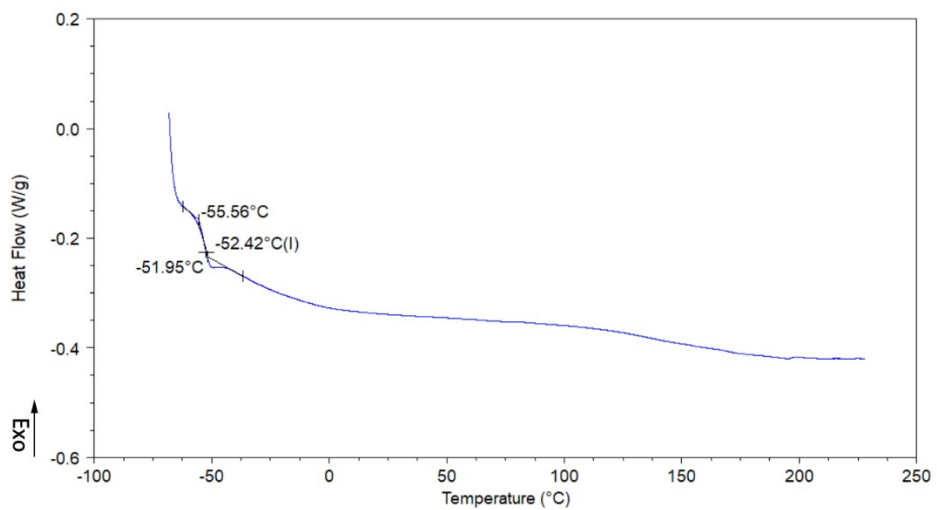

**Figure S36.** DSC curve of polybutadiene (Table 1, entry 1).

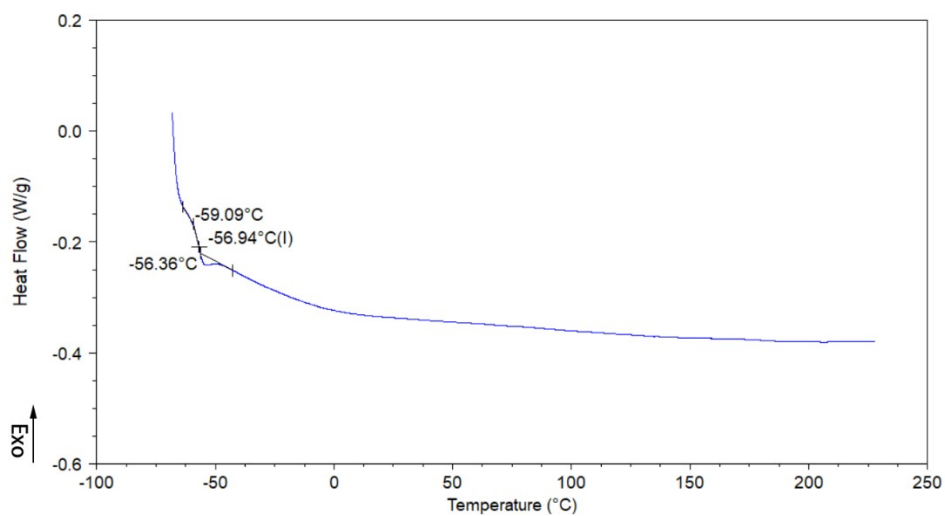

**Figure S37.** DSC curve of polybutadiene (Table 1, entry 2).

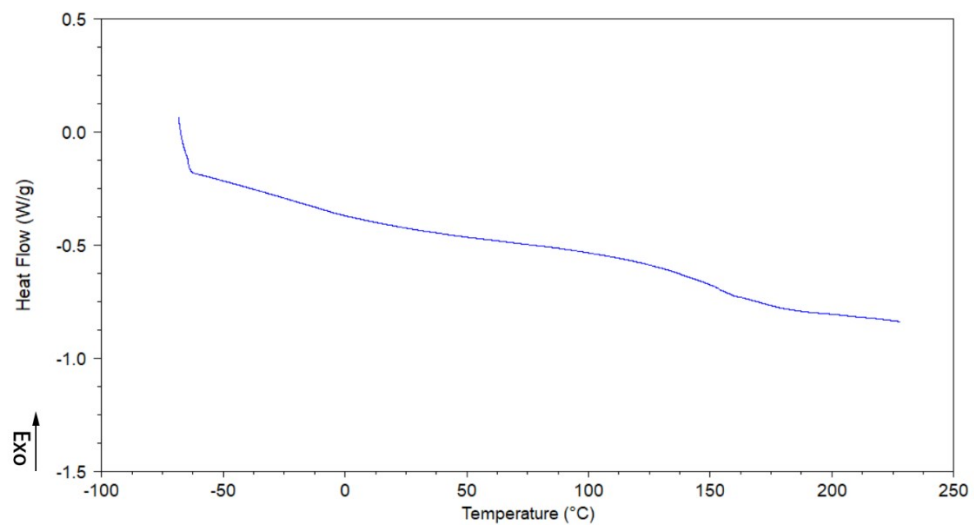

**Figure S38.** DSC curve of polybutadiene (Table 1, entry 3).

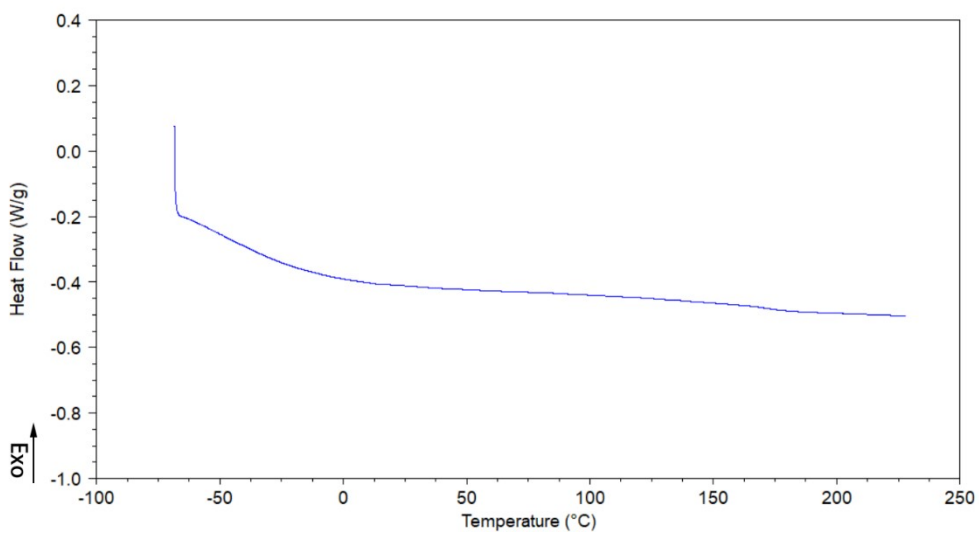

**Figure S39.** DSC curve of polybutadiene (Table 1, entry 5).

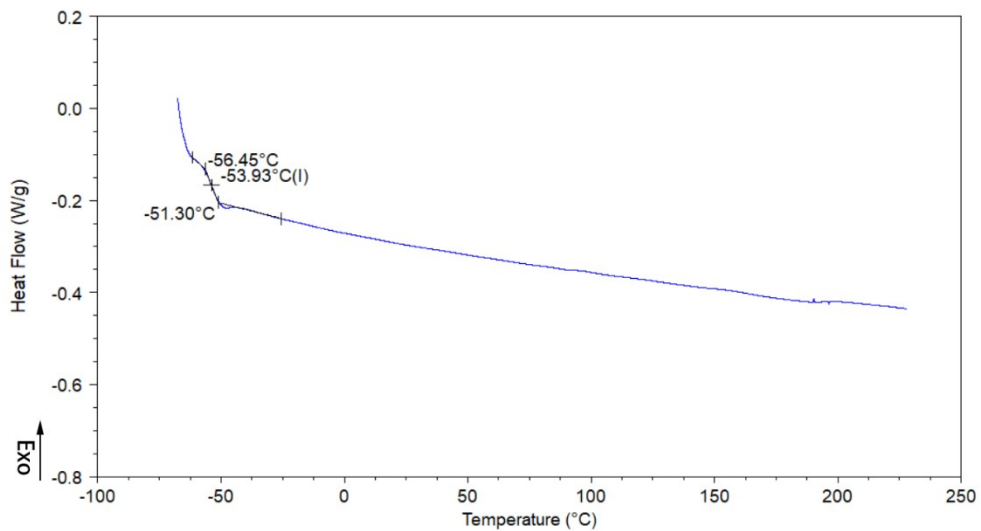

**Figure S40.** DSC curve of polybutadiene (Table 1, entry 6).

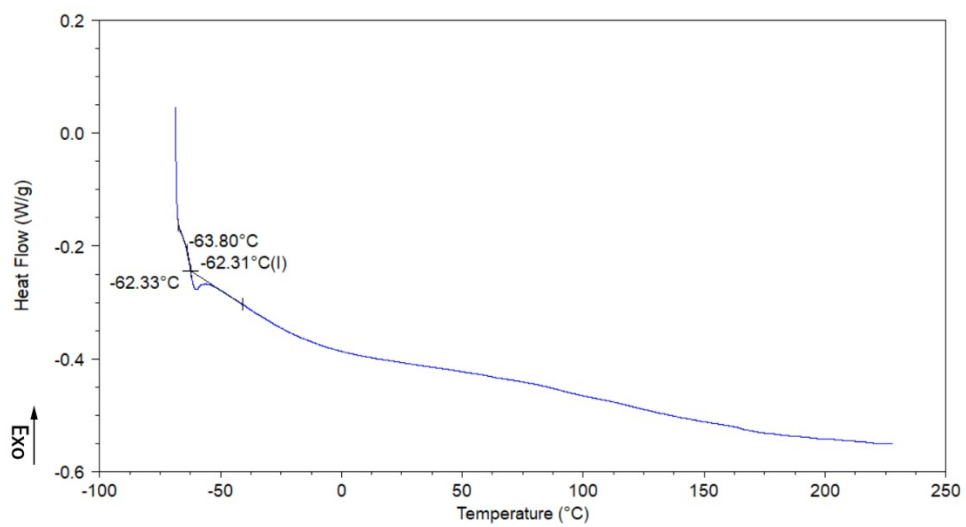

**Figure S41.** DSC curve of polybutadiene (Table 1, entry 7).

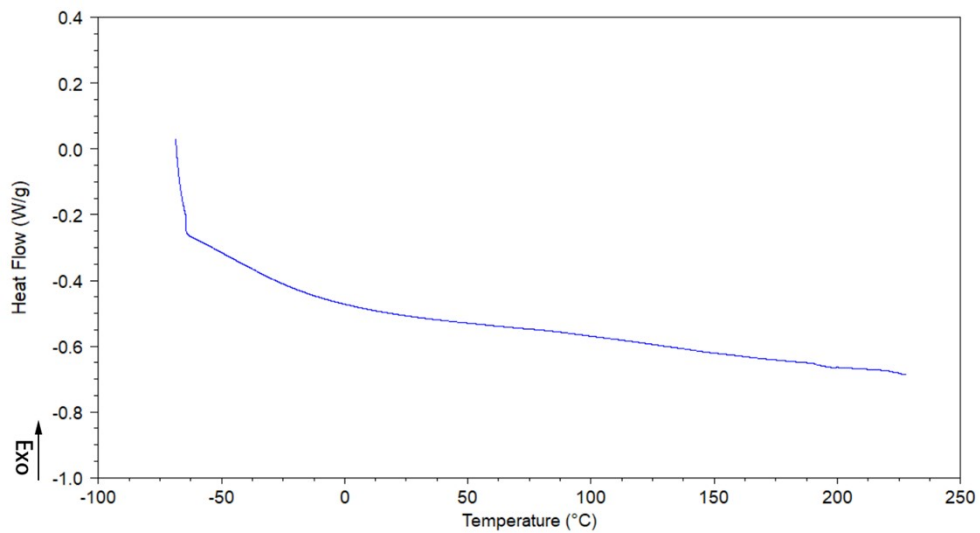

**Figure S42.** DSC curve of polybutadiene (Table 1, entry 8).

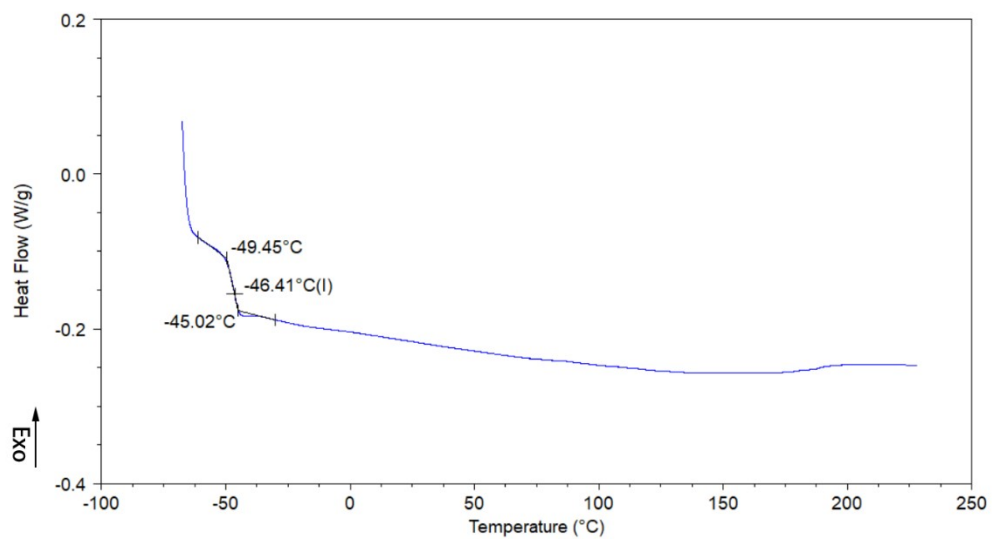

**Figure S43.** DSC curve of polybutadiene (Table 2, entry 1).

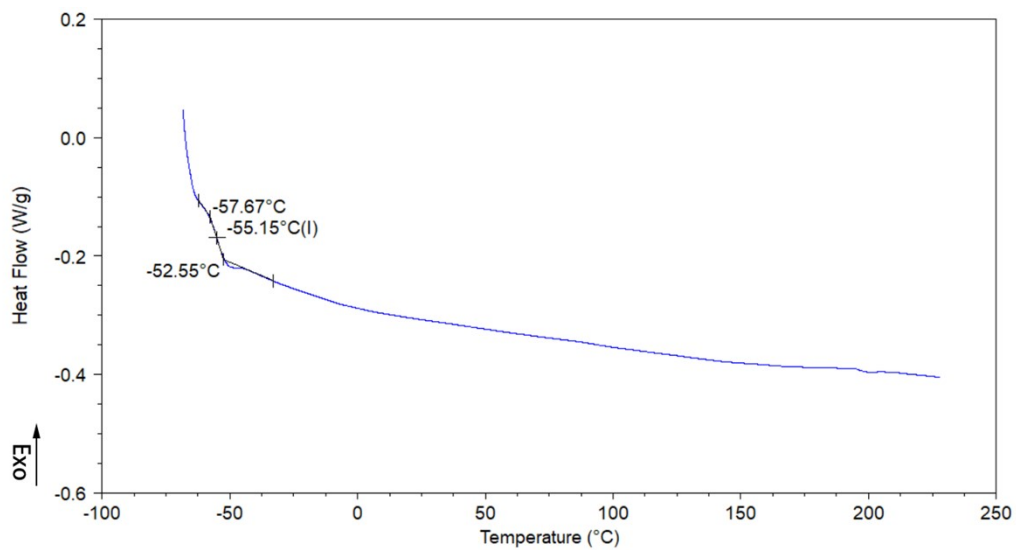

**Figure S44.** DSC curve of polybutadiene (Table 2, entry 2).

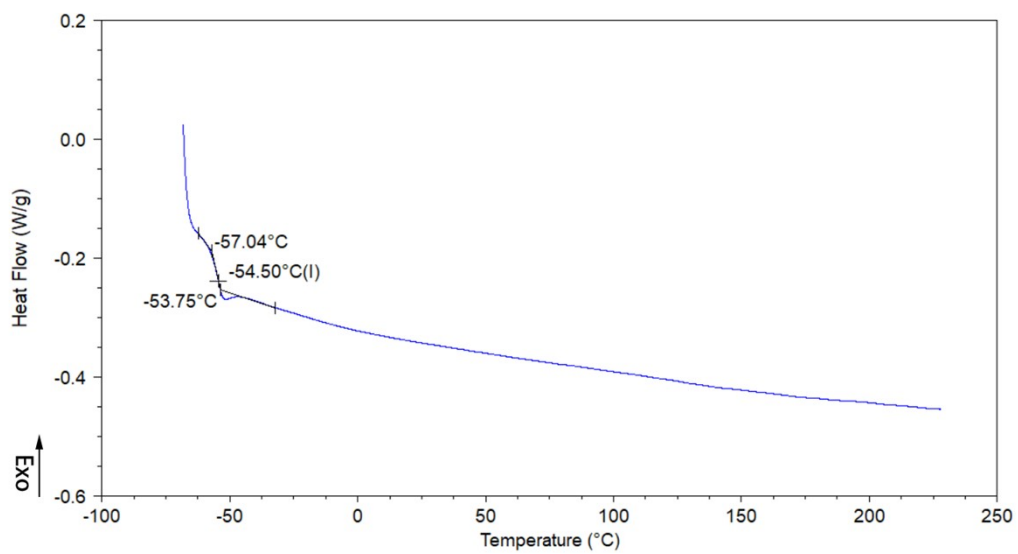

**Figure S45.** DSC curve of polybutadiene (Table 2, entry 4).

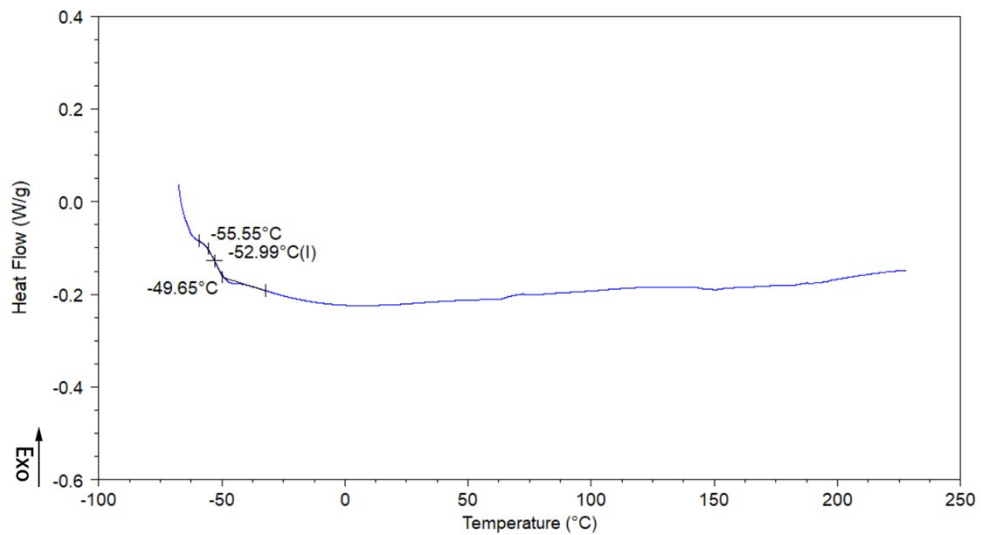

**Figure S46.** DSC curve of polybutadiene (Table 2, entry 5).

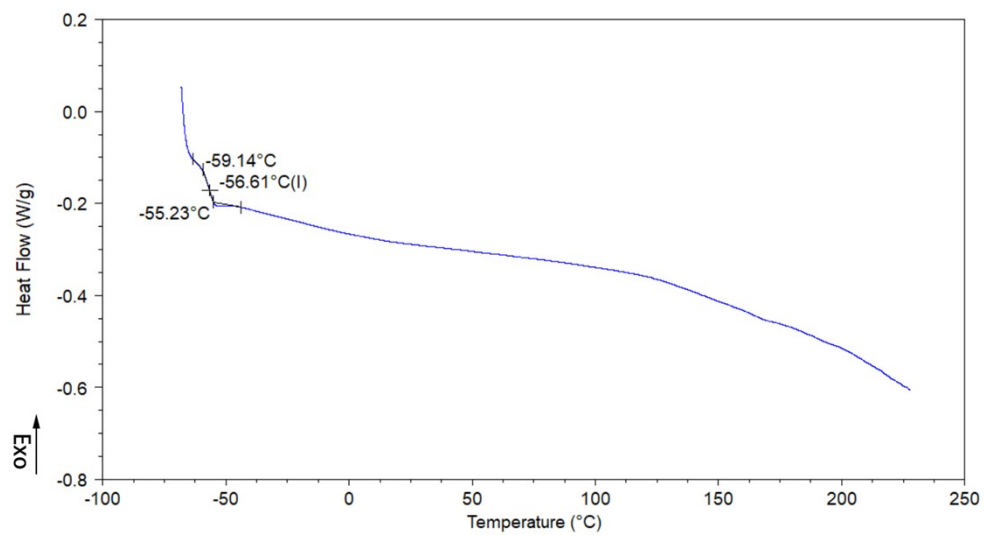

**Figure S47.** DSC curve of polybutadiene (Table 2, entry 6).



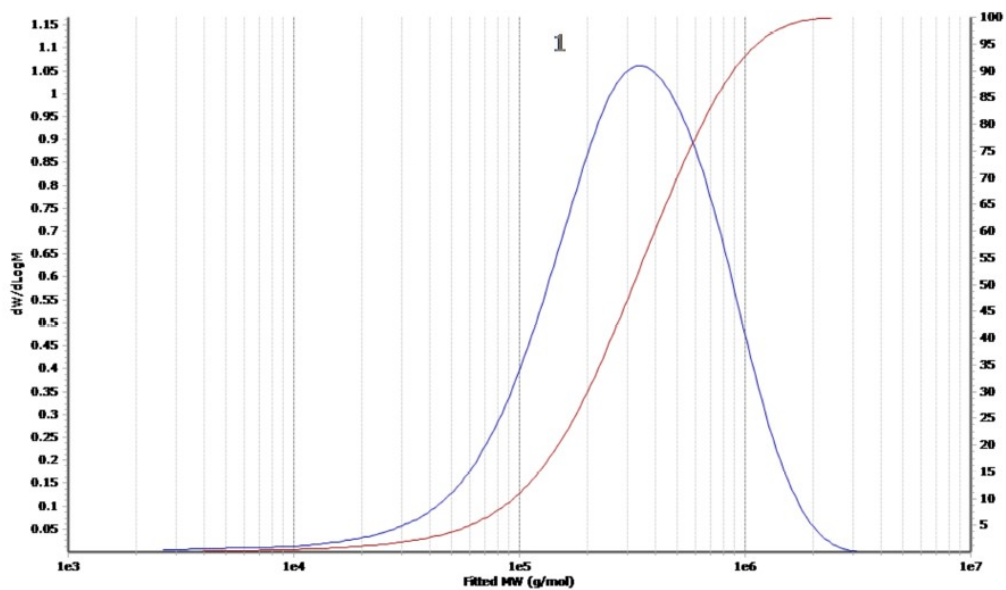

Figure S48. GPC curve of polybutadiene (Table 1, entry 1).

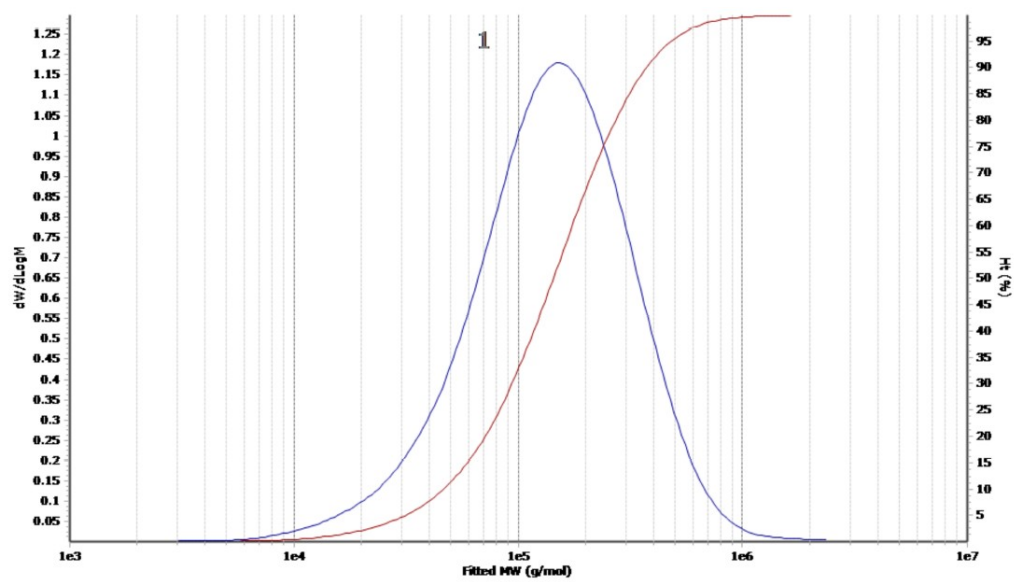

Figure S49. GPC curve of polybutadiene (Table 1, entry 2).

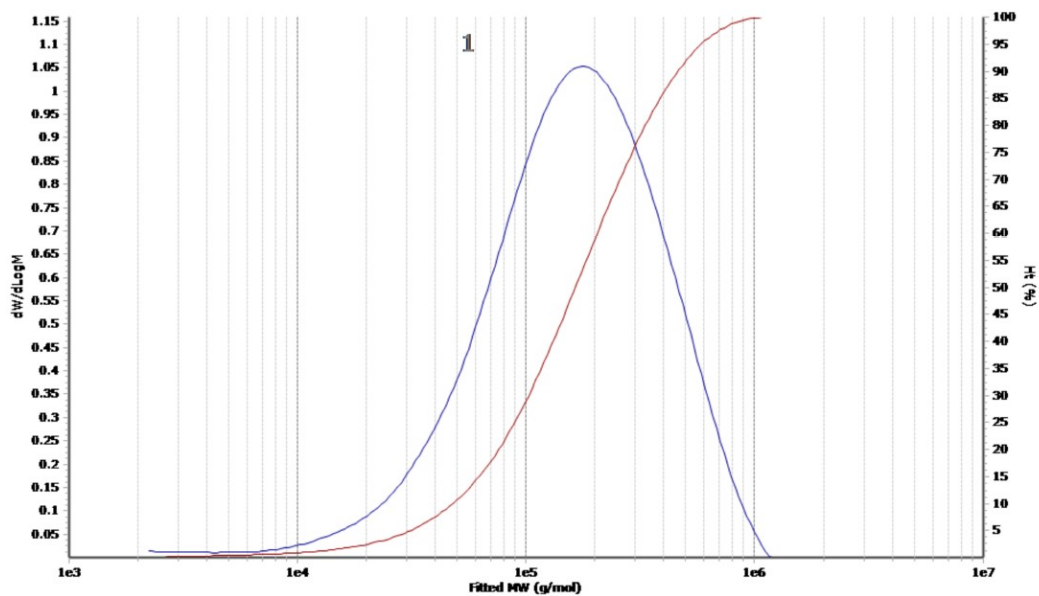

Figure S50. GPC curve of polybutadiene (Table 1, entry 3).

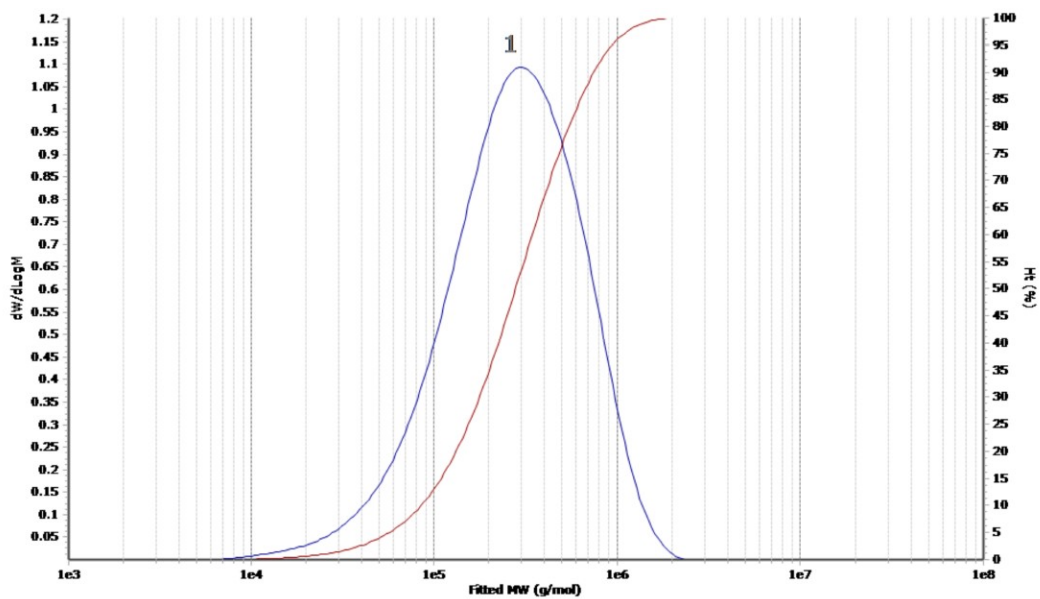

Figure S51. GPC curve of polybutadiene (Table 1, entry 5).

**Table S8.** Selected Average Interatomic Distances (Å) and Selected Average Angles (deg) for AlComplexes **1a**, **3a**, **4a**, **5a**, **6a**, and **7a**.

|                                             | <b>1a</b>  | <b>3a</b> | <b>4a</b> | <b>5a</b> | <b>6a</b>  | <b>7a</b>  |
|---------------------------------------------|------------|-----------|-----------|-----------|------------|------------|
| Al-N1                                       | 1.9560(15) | 1.959(3)  | 1.991(3)  | 1.957(3)  | 1.9510(15) | 1.970(2)   |
| Al-N2                                       | 1.8634(14) | 1.831(3)  | 1.848(2)  | 1.830(3)  | 1.8687(15) | 1.8394(16) |
| Al-C <sub>Me1</sub>                         | 1.960(2)   | 1.963(4)  | 1.965(4)  | 1.972(4)  | 1.949(2)   | 1.959(3)   |
| Al-C <sub>Me2</sub>                         | 1.961(2)   | 1.967(4)  | 1.974(4)  | 1.963(5)  | 1.949(2)   | 1.952(3)   |
| N1-Al-N2                                    | 84.98(6)   | 84.94(14) | 84.48(11) | 85.56(13) | 84.95(6)   | 83.81(8)   |
| C <sub>Me1</sub> -Al-C <sub>Me2</sub>       | 117.11(10) | 112.8(2)  | 112.8(2)  | 110.8(2)  | 116.85(11) | 116.18(15) |
| Dihedral angles of two aromatic ring planes | 1.235      | 91.803    | 79.854    | 89.143    | 166.121    | 89.304     |
